# Supplementary material
Source: PubMed Central journal article supplement (PMC9791915)
Supplement: NIHMS1838899-supplement-Supplementary_Materials_1.pdf [file NIHMS1838899-supplement-Supplementary_Materials_1.pdf]

## Supplementary Online Material (SOM):

Variability in energy expenditure is much greater in males than females

Lewis G. Halsey<sup>a,\*</sup>, Vincent Careau<sup>b</sup>, Herman Pontzer<sup>c,d</sup>, Philip N. Ainslie<sup>e</sup>, Lene F. Andersen<sup>f</sup>, Liam J. Anderson<sup>e,g</sup>, Lenore Arab<sup>h</sup>, Issad Baddou<sup>i</sup>, Kweku Bedu-Addo<sup>j</sup>, Ellen E. Blaak<sup>k</sup>, Stephane Blanc<sup>l,m</sup>, Alberto G. Bonomi<sup>n</sup>, Carlijn V.C. Bouten<sup>o</sup>, Pascal Bovet<sup>p</sup>, Maciej S. Buchowski<sup>q</sup>, Nancy F. Butte<sup>r</sup>, Stefan G.J.A. Camps<sup>k</sup>, Graeme L. Close<sup>e</sup>, Jamie A. Cooper<sup>l</sup>, Sai Krupa Das<sup>s</sup>, Richard Cooper<sup>t</sup>, Lara R. Dugas<sup>t</sup>, Ulf Ekelund<sup>u</sup>, Sonja Entringer<sup>v,w</sup>, Terrence Forrester<sup>x</sup>, Barry W. Fudge<sup>y</sup>, Annelies H Goris<sup>j</sup>, Michael Gurven<sup>z</sup>, Catherine Hambly<sup>aa</sup>, Asmaa El Hamdouchi<sup>i</sup>, Marije B. Hoos<sup>k</sup>, Sumei Hu<sup>ab,ac</sup>, Noorjehan Joonas<sup>ad</sup>, Annemiek M. Joosen<sup>k</sup>, Peter Katzmarzyk<sup>ae</sup>, Kitty P. Kempen<sup>k</sup>, Misaka Kimura<sup>ae</sup>, William E. Kraus<sup>af</sup>, Robert F. Kushner<sup>ag</sup>, Estelle V. Lambert<sup>ah</sup>, William R. Leonard<sup>ai</sup>, Nader Lessan<sup>aj</sup>, Corby K. Martin<sup>ae</sup>, Anine C. Medin<sup>f,al</sup>, Erwin P. Meijer<sup>k</sup>, James C. Morehen<sup>am,e</sup>, James P. Morton<sup>e</sup>, Marian L. Neuhouwer<sup>an</sup>, Theresa A. Nicklas<sup>r</sup>, Robert M. Ojiambo<sup>ao,ap</sup>, Kirsi H. Pietiläinen<sup>aq</sup>, Yannis P. Pitsiladis<sup>ar</sup>, Jacob Plange-Rhule<sup>as,\*\*</sup>, Guy Plasqui<sup>at</sup>, Ross L. Prentice<sup>an</sup>, Roberto A. Rabinovich<sup>au</sup>, Susan B. Racette<sup>av</sup>, David A. Raichlen<sup>aw</sup>, Eric Ravussin<sup>ae</sup>, Rebecca M. Reynolds<sup>ax</sup>, Susan B. Roberts<sup>s</sup>, Albertine J. Schuit<sup>ay</sup>, Anders M. Sjödin<sup>az</sup>, Eric Stice<sup>ba</sup>, Samuel S. Urlacher<sup>bb,bc</sup>, Giulio Valenti<sup>k,n</sup>, Ludo M. Van Etten<sup>k</sup>, Edgar A. Van Mil<sup>bd</sup>, George Wilson<sup>e</sup>, Brian M. Wood<sup>be,bf</sup>, Jack Yanovski<sup>bg</sup>, Tsukasa Yoshida<sup>af</sup>, Xueying Zhang<sup>bh,ac</sup>, Alexia J. Murphy-Alford<sup>bi</sup>, Cornelia U. Loechl<sup>bi</sup>, Amy H Luke<sup>bj</sup>, Jennifer Rood<sup>ae</sup>, Hiro Sagayama<sup>bk</sup>, Dale A. Schoeller<sup>bl</sup>, William W. Wong<sup>r</sup>, Yosuke Yamada<sup>f,bm</sup>, John R. Speakman<sup>bh,aa,ac,bn</sup>

\*Corresponding author

[l.halsey@roehampton.ac.uk](mailto:l.halsey@roehampton.ac.uk) (L. Halsey)

\*\*deceased

<sup>a</sup> *School of Health and Life Sciences, University of Roehampton, Holybourne Avenue, London, SW15 4JD, UK*

<sup>b</sup> *Department of Biology, University of Ottawa, Ottawa, ON, Canada*

<sup>c</sup> *Evolutionary Anthropology, Duke University, Durham NC, USA*

<sup>d</sup> *Duke Global Health Institute, Duke University, Durham, NC, USA*

<sup>e</sup> *Research Institute for Sport and Exercise Sciences, Liverpool John Moores University, Liverpool, UK*

<sup>f</sup> *Department of Nutrition, Institute of Basic Medical Sciences, University of Oslo, 0317 Oslo, Norway*

<sup>g</sup> *Crewe Alexandra Football Club, Crewe, UK*

<sup>h</sup> *David Geffen School of Medicine, University of California, Los Angeles*

<sup>i</sup> *Unité Mixte de Recherche en Nutrition et Alimentation, CNESTEN-Université Ibn Tofail URAC39, Regional Designated Center of Nutrition Associated with AFRA/IAEA, Rabat, Morocco*

<sup>j</sup> *Department of Physiology, Kwame Nkrumah University of Science and Technology, Kumasi, Ghana*

<sup>k</sup> *Maastricht University, Maastricht, The Netherlands*

<sup>l</sup> *Nutritional Sciences, University of Wisconsin, Madison, WI, USA*

<sup>m</sup> *Institut Pluridisciplinaire Hubert Curien, CNRS Université de Strasbourg, UMR7178, France*

<sup>n</sup> *Phillips Research, Eindhoven, The Netherlands*

<sup>o</sup> *Department of Biomedical Engineering and Institute for Complex Molecular Systems, Eindhoven University of Technology, Eindhoven, The Netherlands*

<sup>p</sup> *Institute of Social and Preventive Medicine, Lausanne University Hospital, Lausanne, Switzerland*

<sup>q</sup> *Division of Gastroenterology, Hepatology and Nutrition, Department of Medicine, Vanderbilt University, Nashville, Tennessee, USA*

<sup>r</sup> *Department of Pediatrics, Baylor College of Medicine, USDA/ARS Children's Nutrition Research Center, Houston, Texas, USA*

<sup>s</sup> *Friedman School of Nutrition Science and Policy, Tufts University, 150 Harrison Ave, Boston, Massachusetts, USA*

<sup>t</sup> *Department of Public Health Sciences, Parkinson School of Health Sciences and Public Health, Loyola University, Maywood, IL, USA*

<sup>u</sup> *Department of Sport Medicine, Norwegian School of Sport Sciences, Oslo, Norway*

- <sup>v</sup> *Charité – Universitätsmedizin Berlin, corporate member of Freie Universität Berlin, Humboldt-Universität zu Berlin, and Berlin Institute of Health (BIH), Institute of Medical Psychology, Berlin, Germany*
- <sup>w</sup> *University of California Irvine, Irvine, California, USA*
- <sup>x</sup> *Solutions for Developing Countries, University of the West Indies, Mona, Kingston, Jamaica*
- <sup>y</sup> *University of Glasgow, Glasgow, UK*
- <sup>z</sup> *Department of Anthropology, University of California Santa Barbara, Santa Barbara, CA, USA*
- <sup>aa</sup> *Institute of Biological and Environmental Sciences, University of Aberdeen, Aberdeen, UK*
- <sup>ab</sup> *Beijing Technology and Business University, Beijing, China*
- <sup>ac</sup> *State Key Laboratory of Molecular developmental Biology, Institute of Genetics and Developmental Biology, Chinese Academy of Sciences, Beijing, China*
- <sup>ad</sup> *Central Health Laboratory, Ministry of Health and Wellness, Mauritius*
- <sup>ae</sup> *Pennington Biomedical Research Center, Baton Rouge, Louisiana, USA*
- <sup>af</sup> *National Institute of Health and Nutrition, National Institutes of Biomedical Innovation, Health and Nutrition, Tokyo, Japan*
- <sup>ag</sup> *Department of Medicine, Duke University, Durham, North Carolina, USA*
- <sup>ah</sup> *Department of Anthropology, Northwestern University, Chicago, IL, USA*
- <sup>ai</sup> *Research Centre for Health through Physical Activity, Lifestyle and Sports medicine, Department of Human Biology, University of Cape Town, Cape Town, South Africa*
- <sup>aj</sup> *Department of Anthropology, Northwestern University, Evanston, IL, USA*
- <sup>ak</sup> *Imperial College London Diabetes Centre, Abu Dhabi, United Arab Emirates and Imperial College London, London, United Kingdom*
- <sup>al</sup> *Department of Nutrition and Public Health, Faculty of Health and Sport Sciences, University of Agder, 4630 Kristiansand, Norway*
- <sup>am</sup> *The FA Group, Burton-Upon-Trent, Staffordshire, UK*
- <sup>an</sup> *Division of Public Health Sciences, Fred Hutchinson Cancer Research Center and School of Public Health, University of Washington, Seattle, WA, USA*

- <sup>ao</sup> *Moi University, Eldoret, Kenya*
- <sup>ap</sup> *University of Global Health Equity, Rwanda*
- <sup>aq</sup> *University of helsinki, and Helsinki University Central Hospital, Helsinki, Finland*
- <sup>ar</sup> *University of Brighton, Eastbourne, UK*
- <sup>as</sup> *Department of Physiology, Kwame Nkrumah University of Science and Technology, Kumasi, Ghana*
- <sup>at</sup> *Department of Nutrition and Movement Sciences, Maastricht University, Maastricht, The Netherlands*
- <sup>au</sup> *University of Edinburgh, Edinburgh, UK*
- <sup>av</sup> *Program in Physical Therapy and Department of Medicine, Washington University School of Medicine, St. Louis, Missouri, USA*
- <sup>aw</sup> *Biological Sciences and Anthropology, University of Southern California, California, USA*
- <sup>ax</sup> *Centre for Cardiovascular Sciences, Queen's Medical Research Institute, University of Edinburgh, Edinburgh, UK*
- <sup>ay</sup> *University of Tilburg, Tilburg, The Netherlands*
- <sup>az</sup> *Department of Nutrition, Exercise and Sports, Copenhagen University, Copenhagen, Denmark*
- <sup>ba</sup> *Department of /Public Mental Health & Population Sciences, Stanford University, Stanford CA, USA*
- <sup>bb</sup> *Department of Anthropology, Baylor University, Waco, TX, USA*
- <sup>bc</sup> *Child and Brain development, CIFAR, Toronto, Canada*
- <sup>bd</sup> *Maastricht University, Maastricht and Lifestyle Medicine Center for Children, Jeroen Bosch Hospital's-Hertogenbosch, The Netherlands*
- <sup>be</sup> *Department of Anthropology University of California Los Angeles, Los Angeles, USA*
- <sup>bf</sup> *Max Planck Institute for Evolutionary Anthropology, Department of Human Behavior, Ecology, and Culture*
- <sup>bg</sup> *Growth and Obesity, Division of Intramural Research, NIH, Bethesda, MD, USA*

<sup>bh</sup> *Center for Energy Metabolism and Reproduction, Shenzhen Institutes of Advanced Technology, Chinese Academy of Sciences, Shenzhen, China*

<sup>bi</sup> *Nutritional and Health Related Environmental Studies Section, Division of Human Health, International Atomic Energy Agency, Vienna, Austria*

<sup>bj</sup> *Division of Epidemiology, Department of Public Health Sciences, Loyola University School of Medicine, Maywood Illinois, USA*

<sup>bk</sup> *Faculty of Health and Sport Sciences, University of Tsukuba, Ibaraki, Japan*

<sup>bl</sup> *Biotech Center and Nutritional Sciences University of Wisconsin, Madison, Wisconsin, USA*

<sup>bm</sup> *Institute for Active Health, Kyoto University of Advanced Science, Kyoto, Japan*

<sup>bn</sup> *CAS Center of Excellence in Animal Evolution and Genetics, Kunming, China*

## SOM S1

R script (R v. 3.5.3; R Core Team, 2013)

```
library(MCMCglmm)
library(dplyr)
rm( list = ls())
#
#this annotated code accompanies the article:
#Title:
#"Variability in energy expenditure is much greater in males than females"
#
#Authors:
#Vincent Careau vcareau@uottawa.ca
#Lewis Halsey L.Halsey@roehampton.ac.uk
#
#The code below can be used to reproduce results in the article,
#using the IAEA DLW database v. 3.1.2
#
DATA<-read.table(file="DLW database v3.1.1 abbreviated.csv", header=T, sep=",")
summary(DATA)
#
#
##### PREPARING DATA
##### PREPARING DATA
#TO ENSURE SAMPLE SIZE DOESN'T CHANGE DEPENDING ON WHICH
COVARIATES IS INCLUDED
#WE NEED TO REMOVE ANY NAs IN THE COVARIATES
# get rid of rows without height as want this as a control variable
nrow(DATA) # 6787
DATA<-DATA[!is.na(DATA$ht),]
nrow(DATA) # 6434
```

```

# get rid of rows without lean body mass as want this as a control variable
DATA<-DATA[!is.na(DATA$LBM),]
nrow(DATA) # 6397

# get rid of rows without age as want this as a control variable
DATA<-DATA[!is.na(DATA$Age),]
nrow(DATA) # 6397

#

# get rid of non-adults
DATA<-DATA[which(DATA$Age>17.999),]
nrow(DATA) # 5016

#

# Get rid of individuals that have repeated measures (thus multiple [two ] rows of
data for each of them)
length(unique(DATA$IND_ID)) # 4647
nrow(DATA) # 5016

DATA.tmp<-DATA
DATA.tmp$NBR<-NA
for(i in unique(DATA.tmp$IND_ID)) DATA.tmp$NBR[which(DATA.tmp$IND_ID==i)]<-
nrow(subset(DATA.tmp,IND_ID==i))
hist(DATA.tmp$NBR)
REPEAT<-subset(DATA.tmp, NBR>1)
SINGLE<-subset(DATA.tmp, NBR==1)
length(unique(REPEAT$IND_ID)) # 364
nrow(SINGLE) # 4283
length(unique(SINGLE$IND_ID)) # 4283
SINGLE2<-REPEAT[!duplicated(REPEAT$IND_ID),]
DATA<-rbind(SINGLE,SINGLE2)
nrow(DATA) # 4647
length(unique(DATA$IND_ID)) # 4647

#

#get rid of people engaged in extreme forms of physical activity

```

```

#(no need to do this with version 10.2 but seems to be required in version 3.1)
DATA$sath<-factor(DATA$sath)
summary(DATA$sath)
nrow(DATA)
DATA<-DATA[-which(DATA$sath=="NotAUA"),]
DATA<-DATA[-which(DATA$sath=="PA"),]
DATA<-DATA[-which(DATA$sath=="AANCT"),]
nrow(DATA) # 4612 # Number of TEE data points
length(which(DATA$BEE>0)) # Number of BEE data points = 1760
#
DATA<-DATA[!is.na(DATA$TEE),]
nrow(DATA) #4602
#
# Derive additional variables for analysis
DATA$AEE<-0.9*DATA$TEE-DATA$BEE #activity energy expenditure (AEE)
DATA$FAT<-DATA$wt_av-DATA$LBM #fat mass
#
#description: percent AEE over TEE
DATA_AEE<-DATA[!is.na(DATA$AEE),]
nrow(DATA_AEE) #1756
mean(DATA_AEE$AEE)/mean(DATA_AEE$TEE)*100
MEANS<-aggregate(TEE~Sex,DATA_AEE,FUN=mean)
MEANS$AEE<-aggregate(AEE~Sex,DATA_AEE,FUN=mean)$AEE
MEANS$BEE<-aggregate(BEE~Sex,DATA_AEE,FUN=mean)$BEE
MEANS$PCT.AEE<-MEANS$AEE/MEANS$TEE*100
plot(BEE~AEE,DATA_AEE)
#
#
##### Descriptives about the sample (as requested by JHE referees) #####
dim(DATA) # 4602 independent data points

```



```

unique(DATA$ISO) # representing 30 different countries
dim(filter(DATA, ISO=="USA")) # But, the majority of those data points (3008) are
from the USA
summarise(
  group_by(DATA, Sex), Tally=n())
#
# Age distributions?
summarise(
  group_by(DATA, Sex), Mean.age=mean(na.exclude(Age))) # females 5 years older
summarise(
  group_by(filter(DATA, Age>60), Sex), Tally=n())
#
### Centre each predictor variable
# note: the non-centred version will be used when they are an outcome variable
DATA$FATc <- DATA$FAT-mean(DATA$FAT, na.rm=TRUE)
DATA$Agec <- DATA$Age-mean(DATA$Age, na.rm=TRUE)
DATA$htc <- DATA$ht-mean(DATA$ht, na.rm=TRUE)
DATA$wt_avc <- DATA$wt_av-mean(DATA$wt_av, na.rm=TRUE)
DATA$LBMc <- DATA$LBM-mean(DATA$LBM, na.rm=TRUE)
#
#get "complete cases" sample sizes
test<-lm(TEE~0+Sex+
          Sex*poly(LBMc,2,raw=TRUE)+
          Sex*poly(FATc,2,raw=TRUE)+
          Sex*poly(Agec,2,raw=TRUE)+
          LBMc*poly(Agec,2,raw=TRUE)+
          FATc*poly(Agec,2,raw=TRUE),data=DATA)
length(resid(test)) #4602 observations in total
DATA$RES_TEE<-resid(test)
nrow(DATA)

```

```
length(DATA$BEE[which(DATA$Sex=="F")]) #3108 observations in females AEE
and BEE
```

```
length(DATA$BEE[which(DATA$Sex=="M")]) #1494 observations in males AEE
and BEE
```

```
#
```

```
#
```

```
DATA_BEE_focus<-DATA[!is.na(DATA$BEE),]
```

```
test<-lm(BEE~0+Sex+
```

```
Sex*poly(LBMc,2,row=TRUE)+
```

```
Sex*poly(FATc,2,row=TRUE)+
```

```
Sex*poly(Agec,2,row=TRUE)+
```

```
LBMc*poly(Agec,2,row=TRUE)+
```

```
FATc*poly(Agec,2,row=TRUE),data=DATA_BEE_focus)
```

```
length(resid(test)) #1756 BEE observations in total
```

```
DATA_BEE_focus$RES_TEE<-resid(test)
```

```
nrow(DATA_BEE_focus)
```

```
### BEE
```

```
length(DATA_BEE_focus$BEE[which(DATA_BEE_focus$Sex=="F")]) #1063
observations in females AEE and BEE
```

```
length(DATA_BEE_focus$BEE[which(DATA_BEE_focus$Sex=="M")]) #693
observations in males AEE and BEE
```

```
##### RUN MODELS FOR EACH VARIABLE
#####
```

```
##### RUN MODELS FOR EACH VARIABLE
#####
```

```
##### RUN MODELS FOR EACH VARIABLE
#####
```

```
##### RUN MODELS FOR EACH VARIABLE
#####
```

```
##### RUN MODELS FOR EACH VARIABLE
#####
```

```
##### RUN MODELS FOR EACH VARIABLE
#####
```

```
#run one model for the variables subsequently included as covariates:
```

```
#Height (cm)
```

```
#LBM (kg)
```

```
#Fat mass (kg)
```

```
#Age (y)
```

```
#
```

```
#then run models for the metabolic variables with different covariates
```

```
#TEE1 = TEE without covariates (MJ d-1)
```

```
#BEE1 = BEE without covariates (MJ d-1)
```

```
#AEE1 = AEE without covariates (MJ d-1)
```

```
#
```

```
#TEE2 = TEE with Height and LBM as covariates
```

```
#BEE2 = BEE with Height and LBM as covariates
```

```
#AEE2 = AEE with Height and LBM as covariates
```

```
#
```

```
#TEE3 = TEE with Height, LBM, fat mass, age as covariates
```

```
#BEE3 = BEE with Height, LBM, fat mass, age as covariates
```

```
#AEE3 = AEE with Height, LBM, fat mass, age as covariates
```

```
#
```

```
#TEE4 = TEE with Height, LBM, fat mass, age, age-squared as covariates plus  
all 2-way interactions
```

```
#BEE4 = BEE with Height, LBM, fat mass, age, age-squared as covariates plus  
all 2-way interactions
```

```
#AEE4 = AEE with Height, LBM, fat mass, age, age-squared as covariates plus  
all 2-way interactions
```

```
#set sampling to have good MCMC convergence
```

```
n=20; NITT=13000*n; BURN=3000*n; THIN=10*n # n=5
```

```
#note: instead of running the models each time, simply load the models (see below)
```

```
#covariates
```

```
MC.height<-MCMCglmm(ht~0+Sex,  
  family="gaussian",  
  random=~ISO,  
  rcov=~idh(Sex):units,  
  #prior =prior.2,  
  nitt=NITT,thin=THIN,burnin=BURN,  
  data=DATA)
```

```
MC.lean<-MCMCglmm(LBM~0+Sex,  
  family="gaussian",  
  random=~ISO,  
  rcov=~idh(Sex):units,  
  #prior =prior.2,  
  nitt=NITT,thin=THIN,burnin=BURN,  
  data=DATA)
```

```
MC.fat<-MCMCglmm(FAT~0+Sex,  
  family="gaussian",  
  random=~ISO,  
  rcov=~idh(Sex):units,  
  #prior =prior.2,  
  nitt=NITT,thin=THIN,burnin=BURN,  
  data=DATA)
```

```
MC.age<-MCMCglmm(Age~0+Sex,  
  family="gaussian",  
  random=~ISO,  
  rcov=~idh(Sex):units,  
  #prior =prior.2,
```

```
nitt=NITT,thin=THIN,burnin=BURN,  
data=DATA)
```

```
#TEE
```

```
MC.TEE1<-MCMCglmm(TEE~0+Sex,  
family="gaussian",  
random=~ISO,  
rcov=~idh(Sex):units,  
#prior =prior.2,  
nitt=NITT,thin=THIN,burnin=BURN,  
data=DATA)
```

```
MC.TEE2<-MCMCglmm(TEE~0+Sex+htc+LBMc,  
family="gaussian",  
random=~ISO,  
rcov=~idh(Sex):units,  
#prior =prior.2,  
nitt=NITT,thin=THIN,burnin=BURN,  
data=DATA)
```

```
MC.TEE3<-MCMCglmm(TEE~0+Sex+htc+LBMc+FATc+Agec,  
family="gaussian",  
random=~ISO,  
rcov=~idh(Sex):units,  
#prior =prior.2,  
nitt=NITT,thin=THIN,burnin=BURN,  
data=DATA)
```

```
MC.TEE4<-MCMCglmm(TEE~0+Sex+htc+  
Sex*poly(LBMc,2,raw=TRUE)+  
Sex*poly(FATc,2,raw=TRUE)+  
Sex*poly(Agec,2,raw=TRUE)+  
LBMc*poly(Agec,2,raw=TRUE)+  
FATc*poly(Agec,2,raw=TRUE),
```

```
family="gaussian",
random=~ISO,
rcov=~idh(Sex):units,
#prior =prior.2,
nitt=NITT,thin=THIN,burnin=BURN,
data=DATA)
```

```
#BEE
```

```
MC.BEE1<-MCMCglmm(BEE~0+Sex,
family="gaussian",
random=~ISO,
rcov=~idh(Sex):units,
#prior =prior.2,
nitt=NITT,thin=THIN,burnin=BURN,
data=DATA)
```

```
MC.BEE2<-MCMCglmm(BEE~0+Sex+htc+LBMc,
family="gaussian",
random=~ISO,
rcov=~idh(Sex):units,
#prior =prior.2,
nitt=NITT,thin=THIN,burnin=BURN,
data=DATA)
```

```
MC.BEE3<-MCMCglmm(BEE~0+Sex+htc+LBMc+FATc+Agec,
family="gaussian",
random=~ISO,
rcov=~idh(Sex):units,
#prior =prior.2,
nitt=NITT,thin=THIN,burnin=BURN,
data=DATA)
```

```
MC.BEE4<-MCMCglmm(BEE~0+Sex+htc+
Sex*poly(LBMc,2,raw=TRUE)+
```

```

Sex*poly(FATc,2,raw=TRUE)+
Sex*poly(Agec,2,raw=TRUE)+
LBMc*poly(Agec,2,raw=TRUE)+
FATc*poly(Agec,2,raw=TRUE),
family="gaussian",
random=~ISO,
rcov=~idh(Sex):units,
#prior =prior.2,
nitt=NITT,thin=THIN,burnin=BURN,
data=DATA)

```

#AEE

```

MC.AEE1<-MCMCglmm(AEE~0+Sex,
family="gaussian",
random=~ISO,
rcov=~idh(Sex):units,
#prior =prior.2,
nitt=NITT,thin=THIN,burnin=BURN,
data=DATA)

MC.AEE2<-MCMCglmm(AEE~0+Sex+htc+LBMc,
family="gaussian",
random=~ISO,
rcov=~idh(Sex):units,
#prior =prior.2,
nitt=NITT,thin=THIN,burnin=BURN,
data=DATA)

```

```

MC.AEE3<-MCMCglmm(AEE~0+Sex+htc+LBMc+FATc+Agec,
family="gaussian",
random=~ISO,
rcov=~idh(Sex):units,

```

```
#prior =prior.2,  
nitt=NITT,thin=THIN,burnin=BURN,  
data=DATA)
```

```
MC.AEE4<-MCMCglmm(AEE~0+Sex+htc+  
    Sex*poly(LBMc,2,raw=TRUE)+  
    Sex*poly(FATc,2,raw=TRUE)+  
    Sex*poly(Agec,2,raw=TRUE)+  
    LBMc*poly(Agec,2,raw=TRUE)+  
    FATc*poly(Agec,2,raw=TRUE),  
family="gaussian",  
random=~ISO,  
rcov=~idh(Sex):units,  
#prior =prior.2,  
nitt=NITT,thin=THIN,burnin=BURN,  
data=DATA)
```

```
#save the models as R objects
```

```
save(MC.height,  
    MC.lean,  
    MC.fat,  
    MC.age,  
    MC.TEE1,  
    MC.TEE2,  
    MC.TEE3,  
    MC.TEE4,  
    MC.BEE1,  
    MC.BEE2,  
    MC.BEE3,  
    MC.BEE4,  
    MC.AEE1,
```



```
MC.AEE2,  
MC.AEE3,  
MC.AEE4, file="MCMC_models.RData")
```

```
load("MCMC_models.RData")
```

```
##### check model convergence #####
```

```
#check effective sample sizes for sex-specific averages
```

```
EFF.sample.fixed<-
```

```
c(summary(MC.height)$solutions[1:2,4],  
summary(MC.lean)$solutions[1:2,4],  
summary(MC.fat)$solutions[1:2,4],  
summary(MC.age)$solutions[1:2,4],  
summary(MC.TEE1)$solutions[1:2,4],  
summary(MC.TEE2)$solutions[1:2,4],  
summary(MC.TEE3)$solutions[1:2,4],  
summary(MC.TEE4)$solutions[1:2,4],  
summary(MC.BEE1)$solutions[1:2,4],  
summary(MC.BEE2)$solutions[1:2,4],  
summary(MC.BEE3)$solutions[1:2,4],  
summary(MC.BEE4)$solutions[1:2,4],  
summary(MC.AEE1)$solutions[1:2,4],  
summary(MC.AEE2)$solutions[1:2,4],  
summary(MC.AEE3)$solutions[1:2,4],  
summary(MC.AEE4)$solutions[1:2,4])
```

```
range(EFF.sample.fixed)
```

```
#check effective sample sizes for sex-specific variances
```

```
EFF.sample.resid<-
```

```
c(summary(MC.height)$Rcovariances[,4],
summary(MC.lean)$Rcovariances[,4],
summary(MC.fat)$Rcovariances[,4],
summary(MC.age)$Rcovariances[,4],
summary(MC.TEE1)$Rcovariances[,4],
summary(MC.TEE2)$Rcovariances[,4],
summary(MC.TEE3)$Rcovariances[,4],
summary(MC.TEE4)$Rcovariances[,4],
summary(MC.BEE1)$Rcovariances[,4],
summary(MC.BEE2)$Rcovariances[,4],
summary(MC.BEE3)$Rcovariances[,4],
summary(MC.BEE4)$Rcovariances[,4],
summary(MC.AEE1)$Rcovariances[,4],
summary(MC.AEE2)$Rcovariances[,4],
summary(MC.AEE3)$Rcovariances[,4],
summary(MC.AEE4)$Rcovariances[,4])
```

```
range(EFF.sample.resid)
```

```
#[1] 860.3274 1529.8571
```

```
#check mode summaries
```

```
summary(MC.height)
```

```
summary(MC.lean)
```

```
summary(MC.fat)
```

```
summary(MC.age)
```

```
summary(MC.TEE1)
```

```
summary(MC.TEE2)
```

```
summary(MC.TEE3)
```

```
summary(MC.TEE4)
```

```
summary(MC.BEE1)
```

```
summary(MC.BEE2)
summary(MC.BEE3)
summary(MC.BEE4)
summary(MC.AEE1)
summary(MC.AEE2)
summary(MC.AEE3)
summary(MC.AEE4)
```

```
#explanation of model outputs
```

```
summary(MC.height)
```

```
#SexF.units is the variance in females
```

```
#SexF is the female mean
```

```
#these can be retrieved from
```

```
mean(MC.height$VCV[,"SexF.units"])
```

```
mean(MC.height$Sol[,"SexF"])
```

```
#you can look at the posterior distribution for these by doing:
```

```
plot(MC.height$VCV[,"SexF.units"])
```

```
plot(MC.height$Sol[,"SexF"])
```

```
#To get the Coefficient of Variation, we can divide the mean variance by the mean average:
```

```
mean(MC.height$VCV[,"SexF.units"])/mean(MC.height$Sol[,"SexF"])
```

```
#But even better, divide the variance by the mean for each posterior,
```

```
POST.F<-MC.height$VCV[,"SexF.units"]/MC.height$Sol[,"SexF"]
```

```
plot(POST.F) #this is the posterior distribution for the Coefficient of Variation
```

```
#therefore, we can calculate the mean and 95% CI for Coefficient of Variation like this:
```

```
posterior.mode(POST.F)
```

```
HPDinterval(POST.F)
```

```
#in one go we can do:
```

```
posterior.mode(MC.height$VCV[,"SexF.units"]/MC.height$Sol[,"SexF"])
```

```
HPDinterval(MC.height$VCV[,"SexF.units"]/MC.height$Sol[,"SexF"])
```

#below we will extract sex-specific means, variances, and coefficient of variances from each model

#first, set up a data.frame to receive the estimates

```
ESTIMATES<-data.frame(Trait=c("Height","LBM","Fat mass","Age",  
    "TEE1","TEE2","TEE3","TEE4",  
    "BEE1","BEE2","BEE3","BEE4",  
    "AEE1","AEE2","AEE3","AEE4"),  
    Mean.M=NA,  
    Mean.M.LC=NA,  
    Mean.M.UC=NA,  
    Mean.F=NA,  
    Mean.F.LC=NA,  
    Mean.F.UC=NA,  
    V.M=NA,  
    V.M.LC=NA,  
    V.M.UC=NA,  
    V.F=NA,  
    V.F.LC=NA,  
    V.F.UC=NA,  
    CV.M=NA,  
    CV.M.LC=NA,  
    CV.M.UC=NA,  
    CV.F=NA,  
    CV.F.LC=NA,  
    CV.F.UC=NA,  
    Ratio=NA,  
    Ratio.LC=NA,  
    Ratio.UC=NA)
```

```

#compile estimates from each model
#Average in males
Mean.M<-c(
posterior.mode(MC.height$Sol)["SexM"],
posterior.mode(MC.lean$Sol)["SexM"],
posterior.mode(MC.fat$Sol)["SexM"],
posterior.mode(MC.age$Sol)["SexM"],
posterior.mode(MC.TEE1$Sol)["SexM"],
posterior.mode(MC.TEE2$Sol)["SexM"],
posterior.mode(MC.TEE3$Sol)["SexM"],
posterior.mode(MC.TEE4$Sol)["SexM"],
posterior.mode(MC.BEE1$Sol)["SexM"],
posterior.mode(MC.BEE2$Sol)["SexM"],
posterior.mode(MC.BEE3$Sol)["SexM"],
posterior.mode(MC.BEE4$Sol)["SexM"],
posterior.mode(MC.AEE1$Sol)["SexM"],
posterior.mode(MC.AEE2$Sol)["SexM"],
posterior.mode(MC.AEE3$Sol)["SexM"],
posterior.mode(MC.AEE4$Sol)["SexM"])
ESTIMATES$Mean.M<-round(Mean.M,2)
#95% credible intervals
Mean.M.CI<-rbind(
HPDinterval(MC.height$Sol[,2]),
HPDinterval(MC.lean$Sol[,2]),
HPDinterval(MC.fat$Sol[,2]),
HPDinterval(MC.age$Sol[,2]),
HPDinterval(MC.TEE1$Sol[,2]),
HPDinterval(MC.TEE2$Sol[,2]),
HPDinterval(MC.TEE3$Sol[,2]),

```

```

HPDinterval(MC.TEE4$Sol[,2]),
HPDinterval(MC.BEE1$Sol[,2]),
HPDinterval(MC.BEE2$Sol[,2]),
HPDinterval(MC.BEE3$Sol[,2]),
HPDinterval(MC.BEE4$Sol[,2]),
HPDinterval(MC.AEE1$Sol[,2]),
HPDinterval(MC.AEE2$Sol[,2]),
HPDinterval(MC.AEE3$Sol[,2]),
HPDinterval(MC.AEE4$Sol[,2])
ESTIMATES$Mean.M.LC<-round(Mean.M.CI[,1],2)
ESTIMATES$Mean.M.UC<-round(Mean.M.CI[,2],2)
#Average in females
Mean.F<-c(
posterior.mode(MC.height$Sol)["SexF"],
posterior.mode(MC.lean$Sol)["SexF"],
posterior.mode(MC.fat$Sol)["SexF"],
posterior.mode(MC.age$Sol)["SexF"],
posterior.mode(MC.TEE1$Sol)["SexF"],
posterior.mode(MC.TEE2$Sol)["SexF"],
posterior.mode(MC.TEE3$Sol)["SexF"],
posterior.mode(MC.TEE4$Sol)["SexF"],
posterior.mode(MC.BEE1$Sol)["SexF"],
posterior.mode(MC.BEE2$Sol)["SexF"],
posterior.mode(MC.BEE3$Sol)["SexF"],
posterior.mode(MC.BEE4$Sol)["SexF"],
posterior.mode(MC.AEE1$Sol)["SexF"],
posterior.mode(MC.AEE2$Sol)["SexF"],
posterior.mode(MC.AEE3$Sol)["SexF"],
posterior.mode(MC.AEE4$Sol)["SexF"])
ESTIMATES$Mean.F<-round(Mean.F,2)

```

```

#95% credible intervals
Mean.F.CI<-rbind(
HPDinterval(MC.height$Sol[,1]),
HPDinterval(MC.lean$Sol[,1]),
HPDinterval(MC.fat$Sol[,1]),
HPDinterval(MC.age$Sol[,1]),
HPDinterval(MC.TEE1$Sol[,1]),
HPDinterval(MC.TEE2$Sol[,1]),
HPDinterval(MC.TEE3$Sol[,1]),
HPDinterval(MC.TEE4$Sol[,1]),
HPDinterval(MC.BEE1$Sol[,1]),
HPDinterval(MC.BEE2$Sol[,1]),
HPDinterval(MC.BEE3$Sol[,1]),
HPDinterval(MC.BEE4$Sol[,1]),
HPDinterval(MC.AEE1$Sol[,1]),
HPDinterval(MC.AEE2$Sol[,1]),
HPDinterval(MC.AEE3$Sol[,1]),
HPDinterval(MC.AEE4$Sol[,1]))
ESTIMATES$Mean.F.LC<-round(Mean.F.CI[,1],2)
ESTIMATES$Mean.F.UC<-round(Mean.F.CI[,2],2)
#variance in males
V.M<-c(
posterior.mode(MC.height$VCV["SexM.units"]),
posterior.mode(MC.lean$VCV["SexM.units"]),
posterior.mode(MC.fat$VCV["SexM.units"]),
posterior.mode(MC.age$VCV["SexM.units"]),
posterior.mode(MC.TEE1$VCV["SexM.units"]),
posterior.mode(MC.TEE2$VCV["SexM.units"]),
posterior.mode(MC.TEE3$VCV["SexM.units"]),
posterior.mode(MC.TEE4$VCV["SexM.units"]),

```

```

posterior.mode(MC.BEE1$VCV[, "SexM.units"]),
posterior.mode(MC.BEE2$VCV[, "SexM.units"]),
posterior.mode(MC.BEE3$VCV[, "SexM.units"]),
posterior.mode(MC.BEE4$VCV[, "SexM.units"]),
posterior.mode(MC.AEE1$VCV[, "SexM.units"]),
posterior.mode(MC.AEE2$VCV[, "SexM.units"]),
posterior.mode(MC.AEE3$VCV[, "SexM.units"]),
posterior.mode(MC.AEE4$VCV[, "SexM.units"]))
ESTIMATES$V.M<-round(V.M,2)
#95% credible intervals in residual variance in males
V.M.CI<-rbind(
HPDinterval(MC.height$VCV[, "SexM.units"]),
HPDinterval(MC.lean$VCV[, "SexM.units"]),
HPDinterval(MC.fat$VCV[, "SexM.units"]),
HPDinterval(MC.age$VCV[, "SexM.units"]),
HPDinterval(MC.TEE1$VCV[, "SexM.units"]),
HPDinterval(MC.TEE2$VCV[, "SexM.units"]),
HPDinterval(MC.TEE3$VCV[, "SexM.units"]),
HPDinterval(MC.TEE4$VCV[, "SexM.units"]),
HPDinterval(MC.BEE1$VCV[, "SexM.units"]),
HPDinterval(MC.BEE2$VCV[, "SexM.units"]),
HPDinterval(MC.BEE3$VCV[, "SexM.units"]),
HPDinterval(MC.BEE3$VCV[, "SexM.units"]),
HPDinterval(MC.AEE1$VCV[, "SexM.units"]),
HPDinterval(MC.AEE2$VCV[, "SexM.units"]),
HPDinterval(MC.AEE3$VCV[, "SexM.units"]),
HPDinterval(MC.AEE4$VCV[, "SexM.units"]))
ESTIMATES$V.M.LC<-round(V.M.CI[,1],2)
ESTIMATES$V.M.UC<-round(V.M.CI[,2],2)
# variance in females

```



```

V.F<-c(
posterior.mode(MC.height$VCV["SexF.units"]),
posterior.mode(MC.lean$VCV["SexF.units"]),
posterior.mode(MC.fat$VCV["SexF.units"]),
posterior.mode(MC.age$VCV["SexF.units"]),
posterior.mode(MC.TEE1$VCV["SexF.units"]),
posterior.mode(MC.TEE2$VCV["SexF.units"]),
posterior.mode(MC.TEE3$VCV["SexF.units"]),
posterior.mode(MC.TEE4$VCV["SexF.units"]),
posterior.mode(MC.BEE1$VCV["SexF.units"]),
posterior.mode(MC.BEE2$VCV["SexF.units"]),
posterior.mode(MC.BEE3$VCV["SexF.units"]),
posterior.mode(MC.BEE4$VCV["SexF.units"]),
posterior.mode(MC.AEE1$VCV["SexF.units"]),
posterior.mode(MC.AEE2$VCV["SexF.units"]),
posterior.mode(MC.AEE3$VCV["SexF.units"]),
posterior.mode(MC.AEE4$VCV["SexF.units"]))
ESTIMATES$V.F<-round(V.F,2)
#95% credible intervals in residual variance in females
V.F.CI<-rbind(
HPDinterval(MC.height$VCV["SexF.units"]),
HPDinterval(MC.lean$VCV["SexF.units"]),
HPDinterval(MC.fat$VCV["SexF.units"]),
HPDinterval(MC.age$VCV["SexF.units"]),
HPDinterval(MC.TEE1$VCV["SexF.units"]),
HPDinterval(MC.TEE2$VCV["SexF.units"]),
HPDinterval(MC.TEE3$VCV["SexF.units"]),
HPDinterval(MC.TEE4$VCV["SexF.units"]),
HPDinterval(MC.BEE1$VCV["SexF.units"]),
HPDinterval(MC.BEE2$VCV["SexF.units"]),

```

```

HPDinterval(MC.BEE3$VCV["SexF.units"],
HPDinterval(MC.BEE4$VCV["SexF.units"],
HPDinterval(MC.AEE1$VCV["SexF.units"],
HPDinterval(MC.AEE2$VCV["SexF.units"],
HPDinterval(MC.AEE3$VCV["SexF.units"],
HPDinterval(MC.AEE4$VCV["SexF.units"]))
ESTIMATES$V.F.LC<-round(V.F.CI[,1],2)
ESTIMATES$V.F.UC<-round(V.F.CI[,2],2)
#CoV in males
CV.M<-c(
posterior.mode(MC.height$VCV["SexM.units"]/MC.height$Sol["SexM"]),
posterior.mode(MC.lean$VCV["SexM.units"] /MC.lean$Sol["SexM"]),
posterior.mode(MC.fat$VCV["SexM.units"] /MC.fat$Sol["SexM"]),
posterior.mode(MC.age$VCV["SexM.units"] /MC.age$Sol["SexM"]),
posterior.mode(MC.TEE1$VCV["SexM.units"] /MC.TEE1$Sol["SexM"]),
posterior.mode(MC.TEE2$VCV["SexM.units"] /MC.TEE2$Sol["SexM"]),
posterior.mode(MC.TEE3$VCV["SexM.units"] /MC.TEE3$Sol["SexM"]),
posterior.mode(MC.TEE4$VCV["SexM.units"] /MC.TEE4$Sol["SexM"]),
posterior.mode(MC.BEE1$VCV["SexM.units"] /MC.BEE1$Sol["SexM"]),
posterior.mode(MC.BEE2$VCV["SexM.units"] /MC.BEE2$Sol["SexM"]),
posterior.mode(MC.BEE3$VCV["SexM.units"] /MC.BEE3$Sol["SexM"]),
posterior.mode(MC.BEE4$VCV["SexM.units"] /MC.BEE4$Sol["SexM"]),
posterior.mode(MC.AEE1$VCV["SexM.units"] /MC.AEE1$Sol["SexM"]),
posterior.mode(MC.AEE2$VCV["SexM.units"] /MC.AEE2$Sol["SexM"]),
posterior.mode(MC.AEE3$VCV["SexM.units"] /MC.AEE3$Sol["SexM"]),
posterior.mode(MC.AEE4$VCV["SexM.units"] /MC.AEE4$Sol["SexM"]))
ESTIMATES$CV.M<-round(CV.M,2)
#95% credible intervals in CoV males
CV.M.CI<-rbind(
HPDinterval(MC.height$VCV["SexM.units"]/MC.height$Sol["SexM"]),

```

```

HPDinterval(MC.lean$VCV["SexM.units"] /MC.lean$Sol["SexM"]),
HPDinterval(MC.fat$VCV["SexM.units"] /MC.fat$Sol["SexM"]),
HPDinterval(MC.age$VCV["SexM.units"] /MC.age$Sol["SexM"]),
HPDinterval(MC.TEE1$VCV["SexM.units"] /MC.TEE1$Sol["SexM"]),
HPDinterval(MC.TEE2$VCV["SexM.units"] /MC.TEE2$Sol["SexM"]),
HPDinterval(MC.TEE3$VCV["SexM.units"] /MC.TEE3$Sol["SexM"]),
HPDinterval(MC.TEE4$VCV["SexM.units"] /MC.TEE4$Sol["SexM"]),
HPDinterval(MC.BEE1$VCV["SexM.units"] /MC.BEE1$Sol["SexM"]),
HPDinterval(MC.BEE2$VCV["SexM.units"] /MC.BEE2$Sol["SexM"]),
HPDinterval(MC.BEE3$VCV["SexM.units"] /MC.BEE3$Sol["SexM"]),
HPDinterval(MC.BEE4$VCV["SexM.units"] /MC.BEE4$Sol["SexM"]),
HPDinterval(MC.AEE1$VCV["SexM.units"] /MC.AEE1$Sol["SexM"]),
HPDinterval(MC.AEE2$VCV["SexM.units"] /MC.AEE2$Sol["SexM"]),
HPDinterval(MC.AEE3$VCV["SexM.units"] /MC.AEE3$Sol["SexM"]),
HPDinterval(MC.AEE4$VCV["SexM.units"] /MC.AEE4$Sol["SexM"]))
ESTIMATES$CV.M.LC<-round(CV.M.CI[,1],2)
ESTIMATES$CV.M.UC<-round(CV.M.CI[,2],2)
#CoV in females
CV.F<-c(
posterior.mode(MC.height$VCV["SexF.units"])/MC.height$Sol["SexF"]),
posterior.mode(MC.lean$VCV["SexF.units"] /MC.lean$Sol["SexF"]),
posterior.mode(MC.fat$VCV["SexF.units"] /MC.fat$Sol["SexF"]),
posterior.mode(MC.age$VCV["SexF.units"] /MC.age$Sol["SexF"]),
posterior.mode(MC.TEE1$VCV["SexF.units"] /MC.TEE1$Sol["SexF"]),
posterior.mode(MC.TEE2$VCV["SexF.units"] /MC.TEE2$Sol["SexF"]),
posterior.mode(MC.TEE3$VCV["SexF.units"] /MC.TEE3$Sol["SexF"]),
posterior.mode(MC.TEE4$VCV["SexF.units"] /MC.TEE4$Sol["SexF"]),
posterior.mode(MC.BEE1$VCV["SexF.units"] /MC.BEE1$Sol["SexF"]),
posterior.mode(MC.BEE2$VCV["SexF.units"] /MC.BEE2$Sol["SexF"]),
posterior.mode(MC.BEE3$VCV["SexF.units"] /MC.BEE3$Sol["SexF"]),

```

```

posterior.mode(MC.BEE4$VCV[, "SexF.units"] /MC.BEE4$Sol[, "SexF"]),
posterior.mode(MC.AEE1$VCV[, "SexF.units"] /MC.AEE1$Sol[, "SexF"]),
posterior.mode(MC.AEE2$VCV[, "SexF.units"] /MC.AEE2$Sol[, "SexF"]),
posterior.mode(MC.AEE3$VCV[, "SexF.units"] /MC.AEE3$Sol[, "SexF"]),
posterior.mode(MC.AEE4$VCV[, "SexF.units"] /MC.AEE4$Sol[, "SexF"]))
ESTIMATES$CV.F<-round(CV.F,2)
#95% credible intervals in CoV males
CV.F.CI<-rbind(
HPDinterval(MC.height$VCV[, "SexF.units"]/MC.height$Sol[, "SexF"]),
HPDinterval(MC.lean$VCV[, "SexF.units"] /MC.lean$Sol[, "SexF"]),
HPDinterval(MC.fat$VCV[, "SexF.units"] /MC.fat$Sol[, "SexF"]),
HPDinterval(MC.age$VCV[, "SexF.units"] /MC.age$Sol[, "SexF"]),
HPDinterval(MC.TEE1$VCV[, "SexF.units"] /MC.TEE1$Sol[, "SexF"]),
HPDinterval(MC.TEE2$VCV[, "SexF.units"] /MC.TEE2$Sol[, "SexF"]),
HPDinterval(MC.TEE3$VCV[, "SexF.units"] /MC.TEE3$Sol[, "SexF"]),
HPDinterval(MC.TEE4$VCV[, "SexF.units"] /MC.TEE4$Sol[, "SexF"]),
HPDinterval(MC.BEE1$VCV[, "SexF.units"] /MC.BEE1$Sol[, "SexF"]),
HPDinterval(MC.BEE2$VCV[, "SexF.units"] /MC.BEE2$Sol[, "SexF"]),
HPDinterval(MC.BEE3$VCV[, "SexF.units"] /MC.BEE3$Sol[, "SexF"]),
HPDinterval(MC.BEE4$VCV[, "SexF.units"] /MC.BEE4$Sol[, "SexF"]),
HPDinterval(MC.AEE1$VCV[, "SexF.units"] /MC.AEE1$Sol[, "SexF"]),
HPDinterval(MC.AEE2$VCV[, "SexF.units"] /MC.AEE2$Sol[, "SexF"]),
HPDinterval(MC.AEE3$VCV[, "SexF.units"] /MC.AEE3$Sol[, "SexF"]),
HPDinterval(MC.AEE4$VCV[, "SexF.units"] /MC.AEE4$Sol[, "SexF"]))
ESTIMATES$CV.F.LC<-round(CV.F.CI[,1],2)
ESTIMATES$CV.F.UC<-round(CV.F.CI[,2],2)
#Ratio Male/female
Ratio<-c(
posterior.mode(MC.height$VCV[, "SexM.units"]/MC.height$VCV[, "SexF.units"]),
posterior.mode(MC.lean$VCV[, "SexM.units"]/MC.lean$VCV[, "SexF.units"]),

```

```

posterior.mode(MC.fat$VCV[, "SexM.units"]/MC.fat$VCV[, "SexF.units"]),
posterior.mode(MC.age$VCV[, "SexM.units"]/MC.age$VCV[, "SexF.units"]),
posterior.mode(MC.TEE1$VCV[, "SexM.units"]/MC.TEE1$VCV[, "SexF.units"]),
posterior.mode(MC.TEE2$VCV[, "SexM.units"]/MC.TEE2$VCV[, "SexF.units"]),
posterior.mode(MC.TEE3$VCV[, "SexM.units"]/MC.TEE3$VCV[, "SexF.units"]),
posterior.mode(MC.TEE4$VCV[, "SexM.units"]/MC.TEE4$VCV[, "SexF.units"]),
posterior.mode(MC.BEE1$VCV[, "SexM.units"]/MC.BEE1$VCV[, "SexF.units"]),
posterior.mode(MC.BEE2$VCV[, "SexM.units"]/MC.BEE2$VCV[, "SexF.units"]),
posterior.mode(MC.BEE3$VCV[, "SexM.units"]/MC.BEE3$VCV[, "SexF.units"]),
posterior.mode(MC.BEE4$VCV[, "SexM.units"]/MC.BEE4$VCV[, "SexF.units"]),
posterior.mode(MC.AEE1$VCV[, "SexM.units"]/MC.AEE1$VCV[, "SexF.units"]),
posterior.mode(MC.AEE2$VCV[, "SexM.units"]/MC.AEE2$VCV[, "SexF.units"]),
posterior.mode(MC.AEE3$VCV[, "SexM.units"]/MC.AEE3$VCV[, "SexF.units"]),
posterior.mode(MC.AEE4$VCV[, "SexM.units"]/MC.AEE4$VCV[, "SexF.units"])
ESTIMATES$Ratio<-round(Ratio,2)
#95% credible intervals of Ratio
Ratio.CI<-rbind(
HPDinterval(MC.height$VCV[, "SexM.units"]/MC.height$VCV[, "SexF.units"]),
HPDinterval(MC.lean$VCV[, "SexM.units"]/MC.lean$VCV[, "SexF.units"]),
HPDinterval(MC.fat$VCV[, "SexM.units"]/MC.fat$VCV[, "SexF.units"]),
HPDinterval(MC.age$VCV[, "SexM.units"]/MC.age$VCV[, "SexF.units"]),
HPDinterval(MC.TEE1$VCV[, "SexM.units"]/MC.TEE1$VCV[, "SexF.units"]),
HPDinterval(MC.TEE2$VCV[, "SexM.units"]/MC.TEE2$VCV[, "SexF.units"]),
HPDinterval(MC.TEE3$VCV[, "SexM.units"]/MC.TEE3$VCV[, "SexF.units"]),
HPDinterval(MC.TEE4$VCV[, "SexM.units"]/MC.TEE4$VCV[, "SexF.units"]),
HPDinterval(MC.BEE1$VCV[, "SexM.units"]/MC.BEE1$VCV[, "SexF.units"]),
HPDinterval(MC.BEE2$VCV[, "SexM.units"]/MC.BEE2$VCV[, "SexF.units"]),
HPDinterval(MC.BEE3$VCV[, "SexM.units"]/MC.BEE3$VCV[, "SexF.units"]),
HPDinterval(MC.BEE4$VCV[, "SexM.units"]/MC.BEE4$VCV[, "SexF.units"]),
HPDinterval(MC.AEE1$VCV[, "SexM.units"]/MC.AEE1$VCV[, "SexF.units"]),

```

```

HPDinterval(MC.AEE2$VCV[,"SexM.units"]/MC.AEE2$VCV[,"SexF.units"]),
HPDinterval(MC.AEE3$VCV[,"SexM.units"]/MC.AEE3$VCV[,"SexF.units"]),
HPDinterval(MC.AEE4$VCV[,"SexM.units"]/MC.AEE4$VCV[,"SexF.units"])
ESTIMATES$Ratio.LC<-round(Ratio.CI[,1],2)
ESTIMATES$Ratio.UC<-round(Ratio.CI[,2],2)
##### Save for Table for manuscript #####
ESTIMATES.round<-round(ESTIMATES[,2:22],1)

#write.table(ESTIMATES, file="ESTIMATES_with_country_as_random_effect.csv",
sep=",")
#write.table(ESTIMATES.round, file="ESTIMATES.round.csv", sep=",")
#####

##### make figure 1
#####

ESTIMATES$Xmale <-
c(0.9,1.9,2.9,3.9,5.9,6.9,7.9,8.9,10.9,11.9,12.9,13.9,15.9,16.9,17.9,18.9)
ESTIMATES$Xfemale<-
c(1.1,2.1,3.1,4.1,6.1,7.1,8.1,9.1,11.1,12.1,13.1,14.1,16.1,17.1,18.1,19.1)
#
par(las=1,mar=c(5,5,0.5,0.5))
plot(V.M~Xmale, ESTIMATES,
pch=16,col=1,cex=1.25,ylim=c(0.26,6.85),xlim=c(6,19),xaxt="n",xlab="",ylab="Varian
ce (±95%CI)")

```

```

points(V.F~Xfemale,ESTIMATES, pch=17,col=1,cex=1.25)
arrows(ESTIMATES$Xmale, ESTIMATES$V.M.LC, ESTIMATES$Xmale,
ESTIMATES$V.M.UC,col=1,code=3,length=0.05,angle=90)

arrows(ESTIMATES$Xfemale,ESTIMATES$V.F.LC,ESTIMATES$Xfemale,ESTIMA
TES$V.F.UC,col=1,code=3,length=0.05,angle=90)

abline(v=10)
abline(v=15)

mtext("TEE",side=3,adj=0.125,line=-1.2)
mtext("BEE",side=3,adj=0.5,line=-1.2)
mtext("AEE",side=3,adj=0.875,line=-1.2)
axis(1,c(6,7,8,9,11,12,13,14,16,17,18,19), las=3,
labels=c("none","set 1","set 2","set 3",
"none","set 1","set 2","set 3",
"none","set 1","set 2","set 3"))
mtext("Covariates", side=1,line=3.5)

```

```
##### testing for a sex x age interaction in variance
#####
```

```
##### testing for a sex x age interaction in variance
#####
```

```
##### testing for a sex x age interaction in variance
#####
```

```
##### testing for a sex x age interaction in variance
#####
```

```
##### testing for a sex x age interaction in variance
#####
```

```
##### testing for a sex x age interaction in variance
#####
```

```
#reviewer comment:
```

#The effect of age on EE is controlled for in some of the analyses, but is the variance ratio affected by age?

#Sexual selection based explanations would predict that variance would be relatively higher among young men.

```
hist(DATA$Age)
```

#split the data into 4 equal age periods

```
quantile(DATA$Age)
```

```
DATA$AGE_cat<-1
```

```
DATA$AGE_cat[which(DATA$Age>32)]<-2
```

```
DATA$AGE_cat[which(DATA$Age>48)]<-3
```

```
DATA$AGE_cat[which(DATA$Age>69)]<-4
```

```
DATA$AGE_cat<-factor(DATA$AGE_cat)
```

```
plot(Age~AGE_cat,DATA)
```

```
DATA$n<-1
```

```
aggregate(n~AGE_cat,DATA,FUN=sum)
```

#look at sex-specific sample sizes

```
DATA$SEX_AGE<-factor(paste(DATA$Sex,DATA$AGE_cat,sep="_"))
```

```
aggregate(n~SEX_AGE,DATA,FUN=sum)
```

#set priors for 8 separate residual variances

```
prior.3<-list(R=list(R1=list(V=diag(8), nu=1.002)))
```

#run the model with 8 separate residual variances (4 for females and 4 for males)

```
MC.hete.5<-MCMCglmm(TEE~0+SEX_AGE+  
    Sex*poly(LBMc,2,raw=TRUE)+  
    Sex*poly(FATc,2,raw=TRUE)+  
    Sex*poly(Agec,2,raw=TRUE)+  
    LBMc*poly(Agec,2,raw=TRUE)+  
    FATc*poly(Agec,2,raw=TRUE),  
    family="gaussian",
```



```

random=~ISO,
rcov=~idh(SEX_AGE):units,
# prior =prior.3,
nitt=NITT,thin=THIN,burnin=BURN,
data=DATA)

```

```
save(MC.hete.5,file="MC.hete.5.RData")
```

```
load(file="MC.hete.5.RData")
```

```
summary(MC.hete.5)
```

```
V<-c(
```

```
posterior.mode(MC.hete.5$VCV["SEX_AGEF_1.units"]),
```

```
posterior.mode(MC.hete.5$VCV["SEX_AGEF_2.units"]),
```

```
posterior.mode(MC.hete.5$VCV["SEX_AGEF_3.units"]),
```

```
posterior.mode(MC.hete.5$VCV["SEX_AGEF_4.units"]),
```

```
posterior.mode(MC.hete.5$VCV["SEX_AGEM_1.units"]),
```

```
posterior.mode(MC.hete.5$VCV["SEX_AGEM_2.units"]),
```

```
posterior.mode(MC.hete.5$VCV["SEX_AGEM_3.units"]),
```

```
posterior.mode(MC.hete.5$VCV["SEX_AGEM_4.units"]))
```

```
#
```

```
CI<-rbind(
```

```
HPDinterval(MC.hete.5$VCV["SEX_AGEF_1.units"]),
```

```
HPDinterval(MC.hete.5$VCV["SEX_AGEF_2.units"]),
```

```
HPDinterval(MC.hete.5$VCV["SEX_AGEF_3.units"]),
```

```
HPDinterval(MC.hete.5$VCV["SEX_AGEF_4.units"]),
```

```
HPDinterval(MC.hete.5$VCV["SEX_AGEM_1.units"]),
```

```
HPDinterval(MC.hete.5$VCV["SEX_AGEM_2.units"]),
```

```
HPDinterval(MC.hete.5$VCV["SEX_AGEM_3.units"]),
```

```
HPDinterval(MC.hete.5$VCV["SEX_AGEM_4.units"]))
```

```
#
```

```

CV<-c(
posterior.mode(MC.hete.5$VCV["SEX_AGEF_1.units"]/MC.hete.5$Sol["SEX_AGE
F_1"]),
posterior.mode(MC.hete.5$VCV["SEX_AGEF_2.units"]/MC.hete.5$Sol["SEX_AGE
F_2"]),
posterior.mode(MC.hete.5$VCV["SEX_AGEF_3.units"]/MC.hete.5$Sol["SEX_AGE
F_3"]),
posterior.mode(MC.hete.5$VCV["SEX_AGEF_4.units"]/MC.hete.5$Sol["SEX_AGE
F_4"]),
posterior.mode(MC.hete.5$VCV["SEX_AGEM_1.units"]/MC.hete.5$Sol["SEX_AGE
M_1"]),
posterior.mode(MC.hete.5$VCV["SEX_AGEM_2.units"]/MC.hete.5$Sol["SEX_AGE
M_2"]),
posterior.mode(MC.hete.5$VCV["SEX_AGEM_3.units"]/MC.hete.5$Sol["SEX_AGE
M_3"]),
posterior.mode(MC.hete.5$VCV["SEX_AGEM_4.units"]/MC.hete.5$Sol["SEX_AGE
M_4"]))
#
CV.CI<-rbind(
HPDinterval(MC.hete.5$VCV["SEX_AGEF_1.units"]/MC.hete.5$Sol["SEX_AGEF_1
"]),
HPDinterval(MC.hete.5$VCV["SEX_AGEF_2.units"]/MC.hete.5$Sol["SEX_AGEF_2
"]),
HPDinterval(MC.hete.5$VCV["SEX_AGEF_3.units"]/MC.hete.5$Sol["SEX_AGEF_3
"]),
HPDinterval(MC.hete.5$VCV["SEX_AGEF_4.units"]/MC.hete.5$Sol["SEX_AGEF_4
"]),
HPDinterval(MC.hete.5$VCV["SEX_AGEM_1.units"]/MC.hete.5$Sol["SEX_AGEM_
1"]),
HPDinterval(MC.hete.5$VCV["SEX_AGEM_2.units"]/MC.hete.5$Sol["SEX_AGEM_
2"]),
HPDinterval(MC.hete.5$VCV["SEX_AGEM_3.units"]/MC.hete.5$Sol["SEX_AGEM_
3"]),
HPDinterval(MC.hete.5$VCV["SEX_AGEM_4.units"]/MC.hete.5$Sol["SEX_AGEM_
4"]))
#

```

```

V.AGE<-data.frame(cbind(V,CI,CV,CV.CI))
V.AGE$x<-c(0.95,1.95,2.95,3.95,1.05,2.05,3.05,4.05)
V.AGE$COL<-
c("pink2","pink2","pink2","pink2","paleturquoise3","paleturquoise3","paleturquoise3","
paleturquoise3")
V.AGE$PCH<-c(17,17,17,17,16,16,16,16)
#Ratio Male/female #Ratio Male/female #Ratio Male/female #Ratio Male/female
#Ratio Male/female #Ratio Male/female #Ratio Male/female #Ratio Male/female
#Ratio Male/female #Ratio Male/female #Ratio Male/female #Ratio Male/female
RATIO<-c(
posterior.mode(MC.hete.5$VCV["SEX_AGEM_1.units"]/MC.hete.5$VCV["SEX_AGEF
EF_1.units"]),
posterior.mode(MC.hete.5$VCV["SEX_AGEM_2.units"]/MC.hete.5$VCV["SEX_AGEF
EF_2.units"]),
posterior.mode(MC.hete.5$VCV["SEX_AGEM_3.units"]/MC.hete.5$VCV["SEX_AGEF
EF_3.units"]),
posterior.mode(MC.hete.5$VCV["SEX_AGEM_4.units"]/MC.hete.5$VCV["SEX_AGEF
EF_4.units"]))
RATIO.CI<-rbind(
HPDinterval(MC.hete.5$VCV["SEX_AGEM_1.units"]/MC.hete.5$VCV["SEX_AGEF
_1.units"]),
HPDinterval(MC.hete.5$VCV["SEX_AGEM_2.units"]/MC.hete.5$VCV["SEX_AGEF
_2.units"]),
HPDinterval(MC.hete.5$VCV["SEX_AGEM_3.units"]/MC.hete.5$VCV["SEX_AGEF
_3.units"]),
HPDinterval(MC.hete.5$VCV["SEX_AGEM_4.units"]/MC.hete.5$VCV["SEX_AGEF
_4.units"]))

# Figure 3
x11(7,3)
par(mfrow=c(1,3),las=1,mar=c(6,5,0.5,0.5))
plot(V~x, V.AGE,
pch=PCH,col=1,ylim=c(0,4.5),xlim=c(0.5,4.54),xaxt="n",xlab="",ylab="Variance
(±95%CI)")

```

```

arrows(V.AGE$x, V.AGE$lower, V.AGE$x, V.AGE$upper,
col=1,code=3,length=0.05,angle=90)
axis(1,c(1,2,3,4), las=3,labels=c("18 to 32","33 to 48","49 to 69","70 to 96"))
mtext("Age category", side=1,line=4.5)
mtext("A", side=3,line=-1.2,adj=0.02)
#add sample sizes
text(1,1.40,"734",cex=0.8)
text(2,1.25,"677",cex=0.8)
text(3,0.95,"797",cex=0.8)
text(4,0.70,"900",cex=0.8)
#
text(1,3.1,"413",cex=0.8)
text(2,3.3,"441",cex=0.8)
text(3,2.1,"364",cex=0.8)
text(4,1.6,"276",cex=0.8)
#plot CVs
plot(CV~x, V.AGE,
pch=PCH,col=1,ylim=c(0,0.8),xlim=c(0.5,4.5),xaxt="n",xlab="",ylab="Coefficient of
variance ( $\pm 95\%$ CI)")
arrows(V.AGE$x, V.AGE$lower.1, V.AGE$x, V.AGE$upper.1,
col=1,code=3,length=0.05,angle=90)
axis(1,c(1,2,3,4), las=3,labels=c("18 to 32","33 to 48","49 to 69","70 to 96"))
mtext("Age category", side=1,line=4.5)
mtext("B", side=3,line=-1.2,adj=0.02)
#
plot(1:4,RATIO,
pch=16,col=1,ylim=c(1.5,3.1),xlim=c(0.5,4.54),xaxt="n",xlab="",ylab="M:F variance
ratio ( $\pm 95\%$ CI)")
arrows(1:4, RATIO.CI[,1], 1:4, RATIO.CI[,2], col=1,code=3,length=0.05,angle=90)
axis(1,c(1,2,3,4), las=3,labels=c("18 to 32","33 to 48","49 to 69","70 to 96"))
mtext("C", side=3,line=-1.2,adj=0.02)
mtext("Age category", side=1,line=4.5)

```

```
#check country if USA (or USA as 'West') have different variance than elsewhere in the world
```

```
#check country if USA (or USA as 'West') have different variance than elsewhere in the world
```

```
#check country if USA (or USA as 'West') have different variance than elsewhere in the world
```

```
#check country if USA (or USA as 'West') have different variance than elsewhere in the world
```

```
#check country if USA (or USA as 'West') have different variance than elsewhere in the world
```

```
#check country if USA (or USA as 'West') have different variance than elsewhere in the world
```

```
summary(DATA)
```

```
DATA$ISO<-factor(DATA$ISO)
```

```
plot(TEE~ISO,DATA)
```

```
DATA$n<-1
```

```
aggregate(n~ISO,DATA,FUN=sum)
```

```
DATA$USA<-"USA"
```

```
DATA$USA[which(DATA$ISO=="BOL")]<-"other" #Bolivia
```

```
#DATA$USA[which(DATA$ISO=="CHE")]<-"other" #Switzerland ### Removed by Lewis 21.12.10th
```

```
DATA$USA[which(DATA$ISO=="Chile")]<-"other" #Chile
```

```
DATA$USA[which(DATA$ISO=="CHN")]<-"other" #China
```

```
DATA$USA[which(DATA$ISO=="ECU")]<-"other" #Ecuador
```

```
DATA$USA[which(DATA$ISO=="GHA")]<-"other" #Ghana
```

```
DATA$USA[which(DATA$ISO=="JAM")]<-"other" #Jamaica
```

```
DATA$USA[which(DATA$ISO=="JPN")]<-"other" #Japan
```

```
DATA$USA[which(DATA$ISO=="KEN")]<-"other" #Kenya
```

```
DATA$USA[which(DATA$ISO=="MUS")]<-"other" #Mauritius ### Added by Lewis 21.12.10th
```

```

DATA$USA[which(DATA$ISO=="NGA")]<-"other" #Nigeria
DATA$USA[which(DATA$ISO=="NPL")]<-"other" #Nepal
DATA$USA[which(DATA$ISO=="SYC")]<-"other" #Seychelles
DATA$USA[which(DATA$ISO=="TZA")]<-"other" #Tanzania
DATA$USA[which(DATA$ISO=="ZAF")]<-"other" #South Africa
## Thee above leaves the following countries under USA (aka West): USA, DEU,
NLD, AUS, FIN, BEL, SWE, FRA,
## GBR, NOR, GRC, CHE[Switz]

```

```
# Ethnicity within Western v. other
```

```

summarise(
  group_by(DATA, eth1, USA), Tally=n())

```

```
# Occupation within Western v. Other. DATA TOO PIECEMEAL? ALSO
SHOULDN'T R (RETIRED) BY IN THE JAPAN
```

```
# PART OF THE NON-WEST GROUP?
```

```

summarise(
  group_by(DATA, occ_ISCO, USA), Tally=n())

```

```
DATA$USA<-factor(DATA$USA)
```

```
plot(TEE~USA,DATA)
```

```
aggregate(n~USA,DATA,FUN=sum)
```

```
DATA$SEX_USA<-factor(paste(DATA$Sex,DATA$USA,sep="_"))
```

```
aggregate(n~SEX_USA,DATA,FUN=sum)
```

```
#run the model with 8 separate residual variances (4 for females and 4 for males)
```

```

MC.hete.USA<-MCMCglmm(TEE~0+Sex+
  Sex*poly(LBMc,2,raw=TRUE)+
  Sex*poly(FATc,2,raw=TRUE)+

```

```

Sex*poly(Agec,2,raw=TRUE)+
LBMc*poly(Agec,2,raw=TRUE)+
FATc*poly(Agec,2,raw=TRUE),
family="gaussian",
random=~ISO,
rcov=~idh(SEX_USA):units,
#prior =prior.3,
#nitt=NITT,thin=THIN,burnin=BURN,
data=DATA)

```

```
summary(MC.hete.USA)
```

```

V.USA<-c(
posterior.mode(MC.hete.USA$VCV["SEX_USAM_USA.units"]),
posterior.mode(MC.hete.USA$VCV["SEX_USAF_USA.units"]),
posterior.mode(MC.hete.USA$VCV["SEX_USAM_other.units"]),
posterior.mode(MC.hete.USA$VCV["SEX_USAF_other.units"]))

```

```

V.USA.CI<-rbind(
HPDinterval(MC.hete.USA$VCV["SEX_USAM_USA.units"]),
HPDinterval(MC.hete.USA$VCV["SEX_USAF_USA.units"]),
HPDinterval(MC.hete.USA$VCV["SEX_USAM_other.units"]),
HPDinterval(MC.hete.USA$VCV["SEX_USAF_other.units"]))

```

```
USA<-data.frame(cbind(V.USA,V.USA.CI))
```

```
USA$x<-c(0.95,1.05,1.95,2.05)
```

```
USA$COL<-1
```

```
USA$PCH<-c(16,17,16,17)
```

```
#Ratio Male/female #Ratio Male/female #Ratio Male/female #Ratio Male/female
```

```
#Ratio Male/female #Ratio Male/female #Ratio Male/female #Ratio Male/female
```

```
#Ratio Male/female #Ratio Male/female #Ratio Male/female #Ratio Male/female
```

```

#make figure S1
x11(4,4)
par(las=1,mar=c(5,5,1,1))
  plot(V.USA~x, USA,
pch=PCH,col=COL,ylim=c(0.5,4),xlim=c(0.5,2.5),xaxt="n",xlab="",ylab="Variance
(±95%CI)")
arrows(USA$x, USA$lower, USA$x, USA$upper,
col=USA$COL,code=3,length=0.05,angle=90)
axis(1,c(1,2), las=1,labels=c("West","Other"))
#add sample sizes
text(0.95,2.90,"1226",cex=0.8)
text(1.05,1.0,"2689",cex=0.8)
text(1.95,3.10,"268",cex=0.8)
text(2.05,0.9,"419",cex=0.8)

```

```

##### TWO-STEP ANALYSIS using residuals
#####

```

```

#covariates

```

```

LM.height<-lm(htc~Sex,data=DATA)

```



```

LM.lean<-lm(LBM~Sex,data=DATA)
LM.fat<-lm(FAT~Sex,data=DATA)
LM.age<-lm(Age~Sex,data=DATA)
#Tee
LM.TEE1<-lm(TEE~Sex,data=DATA)
LM.TEE2<-lm(TEE~Sex+htc+LBM,data=DATA)
LM.TEE3<-lm(TEE~Sex+htc+LBM+FAT+Age,data=DATA)

#BEE
LM.BEE1<-lm(BEE~Sex,data=DATA_BEE_focus)
LM.BEE2<-lm(BEE~Sex+htc+LBM,data=DATA_BEE_focus)
LM.BEE3<-lm(BEE~Sex+htc+LBM+FAT+Age,data=DATA_BEE_focus)

DATA_AEE_focus<-DATA[!is.na(DATA$AEE),]
#AEE
LM.AEE1<-lm(AEE~Sex,data=DATA_BEE_focus)
LM.AEE2<-lm(AEE~Sex+htc+LBM,data=DATA_BEE_focus)
LM.AEE3<-lm(AEE~Sex+htc+LBM+FAT+Age,data=DATA_BEE_focus)

DATA$res.height <- resid(LM.height)
DATA$res.lean <-resid(LM.lean)
DATA$res.fat <-resid(LM.fat)
DATA$res.age <-resid(LM.age)
#
DATA$res.TEE1<-resid(LM.TEE1)
DATA$res.TEE2<-resid(LM.TEE2)
DATA$res.TEE3<-resid(LM.TEE3)
#
DATA_BEE_focus$res.BEE1<-resid(LM.BEE1)

```

```

DATA_BEE_focus$res.BEE2<-resid(LM.BEE2)
DATA_BEE_focus$res.BEE3<-resid(LM.BEE3)
#
DATA_AEE_focus$res.AEE1<-resid(LM.AEE1)
DATA_AEE_focus$res.AEE2<-resid(LM.AEE2)
DATA_AEE_focus$res.AEE3<-resid(LM.AEE3)

LM.ESTIMATES<-data.frame(Trait=c("Height","LBM","Fat mass","Age",
      "TEE1","TEE2","TEE3",
      "BEE1","BEE2","BEE3",
      "AEE1","AEE2","AEE3"),
      Vmale=NA,
      Vfemale=NA)

LM.Vmale<-c(
var(DATA$res.height[which(DATA$Sex=="M")]),
var(DATA$res.lean[which(DATA$Sex=="M")]) ,
var(DATA$res.fat[which(DATA$Sex=="M")]) ,
var(DATA$res.age[which(DATA$Sex=="M")]) ,
var(DATA$res.TEE1[which(DATA$Sex=="M")]) ,
var(DATA$res.TEE2[which(DATA$Sex=="M")]) ,
var(DATA$res.TEE3[which(DATA$Sex=="M")]) ,
var(DATA_BEE_focus$res.BEE1[which(DATA_BEE_focus$Sex=="M")]) ,
var(DATA_BEE_focus$res.BEE2[which(DATA_BEE_focus$Sex=="M")]) ,
var(DATA_BEE_focus$res.BEE3[which(DATA_BEE_focus$Sex=="M")]) ,
var(DATA_AEE_focus$res.AEE1[which(DATA_AEE_focus$Sex=="M")]) ,
var(DATA_AEE_focus$res.AEE2[which(DATA_AEE_focus$Sex=="M")]) ,
var(DATA_AEE_focus$res.AEE3[which(DATA_AEE_focus$Sex=="M")]) )
LM.ESTIMATES$Vmale<-LM.Vmale

```

```

LM.Vfemale<-c(
var(DATA$res.height[which(DATA$Sex=="F")]),
var(DATA$res.lean[which(DATA$Sex=="F")]) ,
var(DATA$res.fat[which(DATA$Sex=="F")]) ,
var(DATA$res.age[which(DATA$Sex=="F")]) ,
var(DATA$res.TEE1[which(DATA$Sex=="F")]) ,
var(DATA$res.TEE2[which(DATA$Sex=="F")]) ,
var(DATA$res.TEE3[which(DATA$Sex=="F")]) ,
var(DATA_BEE_focus$res.BEE1[which(DATA_BEE_focus$Sex=="F")]) ,
var(DATA_BEE_focus$res.BEE2[which(DATA_BEE_focus$Sex=="F")]) ,
var(DATA_BEE_focus$res.BEE3[which(DATA_BEE_focus$Sex=="F")]) ,
var(DATA_AEE_focus$res.AEE1[which(DATA_AEE_focus$Sex=="F")]) ,
var(DATA_AEE_focus$res.AEE2[which(DATA_AEE_focus$Sex=="F")]) ,
var(DATA_AEE_focus$res.AEE3[which(DATA_AEE_focus$Sex=="F")]) )
LM.ESTIMATES$Vfemale<-LM.Vfemale

```

```

LM.meanmale<-c(
mean(DATA$res.height[which(DATA$Sex=="M")]),
mean(DATA$res.lean[which(DATA$Sex=="M")]) ,
mean(DATA$res.fat[which(DATA$Sex=="M")]) ,
mean(DATA$res.age[which(DATA$Sex=="M")]) ,
mean(DATA$res.TEE1[which(DATA$Sex=="M")]) ,
mean(DATA$res.TEE2[which(DATA$Sex=="M")]) ,
mean(DATA$res.TEE3[which(DATA$Sex=="M")]) ,
mean(DATA_BEE_focus$res.BEE1[which(DATA_BEE_focus$Sex=="M")]) ,
mean(DATA_BEE_focus$res.BEE2[which(DATA_BEE_focus$Sex=="M")]) ,
mean(DATA_BEE_focus$res.BEE3[which(DATA_BEE_focus$Sex=="M")]) ,
mean(DATA_AEE_focus$res.AEE1[which(DATA_AEE_focus$Sex=="M")]) ,
mean(DATA_AEE_focus$res.AEE2[which(DATA_AEE_focus$Sex=="M")]) ,
mean(DATA_AEE_focus$res.AEE3[which(DATA_AEE_focus$Sex=="M")]) )

```

```
LM.ESTIMATES$meanmale<-LM.meanmale
```

```
LM.meanfemale<-c(
  mean(DATA$res.height[which(DATA$Sex=="F")]),
  mean(DATA$res.lean[which(DATA$Sex=="F")]) ,
  mean(DATA$res.fat[which(DATA$Sex=="F")]) ,
  mean(DATA$res.age[which(DATA$Sex=="F")]) ,
  mean(DATA$res.TEE1[which(DATA$Sex=="F")]) ,
  mean(DATA$res.TEE2[which(DATA$Sex=="F")]) ,
  mean(DATA$res.TEE3[which(DATA$Sex=="F")]) ,
  mean(DATA_BEE_focus$res.BEE1[which(DATA_BEE_focus$Sex=="F")]) ,
  mean(DATA_BEE_focus$res.BEE2[which(DATA_BEE_focus$Sex=="F")]) ,
  mean(DATA_BEE_focus$res.BEE3[which(DATA_BEE_focus$Sex=="F")]) ,
  mean(DATA_AEE_focus$res.AEE1[which(DATA_AEE_focus$Sex=="F")]) ,
  mean(DATA_AEE_focus$res.AEE2[which(DATA_AEE_focus$Sex=="F")]) ,
  mean(DATA_AEE_focus$res.AEE3[which(DATA_AEE_focus$Sex=="F")]) )
LM.ESTIMATES$meanfemale<-LM.meanfemale
```

```
##### Calculating means for male and female
#####
```

```
# See Schielzeth et al. (2010)
```

```
# Create dummy variable for sex M=0, F=1
```

```
DATA$Dummy <- DATA$Sex
```

```
DATA$Dummy <- gsub("M", "0", DATA$Dummy)
```

```
DATA$Dummy <- gsub("F", "1", DATA$Dummy)
```

```
DATA_BEE_focus$Dummy <- DATA_BEE_focus$Sex
```

```
DATA_BEE_focus$Dummy <- gsub("M", "0", DATA_BEE_focus$Dummy)
```

```
DATA_BEE_focus$Dummy <- gsub("F", "1", DATA_BEE_focus$Dummy)
```

```

DATA_AEE_focus$Dummy <- DATA_AEE_focus$Sex
DATA_AEE_focus$Dummy <- gsub("M", "0", DATA_AEE_focus$Dummy)
DATA_AEE_focus$Dummy <- gsub("F", "1", DATA_AEE_focus$Dummy)

# Run lm's, without predictor variable centring, to calculate means and SEs
LM.ht.mean<-summary(LM.height<-lm(ht~0+Dummy, data=DATA))
LM.LBM.mean<-summary(LM.LBM<-lm(LBM~0+Dummy, data=DATA))
LM.FAT.mean<-summary(LM.FAT<-lm(FAT~0+Dummy, data=DATA))
LM.Age.mean<-summary(LM.Age<-lm(Age~0+Dummy, data=DATA))
LM.TEE1.mean<-summary(LM.TEE1<-lm(TEE~0+Dummy, data=DATA))
LM.TEE2.mean<-summary(LM.TEE2<-lm(TEE~0+Dummy+ht+LBM, data=DATA))
LM.TEE3.mean<-summary(LM.TEE3<-lm(TEE~0+Dummy+ht+LBM+FAT+Age,
data=DATA))
LM.BEE1.mean<-summary(LM.BEE1<-lm(BEE~0+Dummy,
data=DATA_BEE_focus))
LM.BEE2.mean<-summary(LM.BEE2<-lm(BEE~0+Dummy+ht+LBM,
data=DATA_BEE_focus))
LM.BEE3.mean<-summary(LM.BEE3<-lm(BEE~0+Dummy+ht+LBM+FAT+Age,
data=DATA_BEE_focus))
LM.AEE1.mean<-summary(LM.AEE1<-lm(AEE~0+Dummy,
data=DATA_AEE_focus))
LM.AEE2.mean<-summary(LM.AEE2<-lm(AEE~0+Dummy+ht+LBM,
data=DATA_AEE_focus))
LM.AEE3.mean<-summary(LM.AEE3<-lm(AEE~0+Dummy+ht+LBM+FAT+Age,
data=DATA_AEE_focus))

MEANS <- data.frame(variables=c("height", "LBM", "FAT", "Age", "TEE1", "TEE2",
"TEE3",
                                "BEE1", "BEE2", "BEE3", "AEE1", "AEE2", "AEE3"),
"MeanM"=NA)

MEANS$MeanM <- round(c(LM.ht.mean$coefficients[1],
LM.LBM.mean$coefficients[1],LM.FAT.mean$coefficients[1],

```

```

LM.Age.mean$coefficients[1], LM.TEE1.mean$coefficients[1],
LM.TEE2.mean$coefficients[1],

LM.TEE3.mean$coefficients[1], LM.BEE1.mean$coefficients[1],
LM.BEE2.mean$coefficients[1],

LM.BEE3.mean$coefficients[1], LM.AEE1.mean$coefficients[1],
LM.AEE2.mean$coefficients[1],

LM.AEE3.mean$coefficients[1]),2)
MEANS$MeanF <- round(c(LM.ht.mean$coefficients[2],
LM.LBM.mean$coefficients[2],LM.FAT.mean$coefficients[2],

LM.Age.mean$coefficients[2], LM.TEE1.mean$coefficients[2],
LM.TEE2.mean$coefficients[2],

LM.TEE3.mean$coefficients[2], LM.BEE1.mean$coefficients[2],
LM.BEE2.mean$coefficients[2],

LM.BEE3.mean$coefficients[2], LM.AEE1.mean$coefficients[2],
LM.AEE2.mean$coefficients[2],

LM.AEE3.mean$coefficients[2]),2)
MEANS$SE.M <- round(c(LM.ht.mean$coefficients[3],
LM.LBM.mean$coefficients[3],LM.FAT.mean$coefficients[3],

LM.Age.mean$coefficients[3], LM.TEE1.mean$coefficients[3],
LM.TEE2.mean$coefficients[5],

LM.TEE3.mean$coefficients[7], LM.BEE1.mean$coefficients[3],
LM.BEE2.mean$coefficients[5],

LM.BEE3.mean$coefficients[7], LM.AEE1.mean$coefficients[3],
LM.AEE2.mean$coefficients[5],

LM.AEE3.mean$coefficients[7]),2)
MEANS$SE.F <- round(c(LM.ht.mean$coefficients[4],
LM.LBM.mean$coefficients[4],LM.FAT.mean$coefficients[4],

LM.Age.mean$coefficients[4], LM.TEE1.mean$coefficients[4],
LM.TEE2.mean$coefficients[6],

LM.TEE3.mean$coefficients[8], LM.BEE1.mean$coefficients[4],
LM.BEE2.mean$coefficients[6],

LM.BEE3.mean$coefficients[8], LM.AEE1.mean$coefficients[4],
LM.AEE2.mean$coefficients[6],

LM.AEE3.mean$coefficients[8]),2)

write.table(file="MEANS.txt", MEANS, sep=",")

```

```

ALL <- cbind(ESTIMATES,MEANS)
write.table(file="ALL.txt", ALL, sep=",")

LM.ESTIMATES$Xmale <-c(0.9,1.9,2.9,3.9,5.9,6.9,7.9,9.9,10.9,11.9,13.9,14.9,15.9)
LM.ESTIMATES$Xfemale<-
c(1.1,2.1,3.1,4.1,6.1,7.1,8.1,10.1,11.1,12.1,14.1,15.1,16.1)

#check LM.ESTIMATES versus MCMC. ESTIMATES
library(png)
library("ggplot2")

#####
##### Plot figures of variance #####
#####

library(gridExtra)

# dev.new()

get_png <- function(filename) {
  grid::rasterGrob(png::readPNG(filename), interpolate = TRUE) #
https://www.markhw.com/blog/logos
}
#standing.pic <- get_png("Person standing.png")
#basal.pic <- get_png("Person basal.png")
#active1.pic <- get_png("Person activity 1.png")
#active2.pic <- get_png("Person activity 2.png")

# jpeg(file="Figure 2.jpg", units = "in", width = 12, height = 12, res=300)

```

```

pdf(file="Figure 2.pdf",          width = 12, height = 12)

f1 <- ggplot(DATA, aes(res.TEE1, fill = Sex)) + geom_density(alpha = 0.2) +
  #geom_vline(xintercept = mean(DATA$res.TEE1[which(DATA$Sex=="F")],
na.rm=TRUE),
  #      linetype="dotted", color = "pink", size=1.25) +
  #geom_vline(xintercept = mean(DATA$res.TEE1[which(DATA$Sex=="M")],
na.rm=TRUE),
  #      linetype="dotted", color = "cyan", size=1.2) +
  annotate(geom="text", x=-8, y=0.4, label="A", size=8) +
  annotate(geom="text", x=-8, y=0.5, label="  Adjusted for sex", size=6) +
  coord_cartesian(xlim = c(-8, 22), ylim = c(0, 0.4)) +
  theme_bw() +
  theme(legend.position = "none", panel.grid.major = element_blank(),
panel.grid.minor = element_blank()) +
  xlab("") +
  ylab("") +
  ggtitle("")
  #annotation_custom(standing.pic, xmin = 15, xmax = 20, ymin = 0.1, ymax = 0.25)

f2 <- ggplot(DATA, aes(res.TEE2, fill = Sex)) + geom_density(alpha = 0.2) +
  #geom_vline(xintercept = mean(DATA$res.TEE2[which(DATA$Sex=="F")],
na.rm=TRUE),
  #      linetype="dotted", color = "pink", size=1.25) +
  #geom_vline(xintercept = mean(DATA$res.TEE2[which(DATA$Sex=="M")],
na.rm=TRUE),
  #      linetype="dotted", color = "cyan", size=1.2) +
  annotate(geom="text", x=-8, y=0.4, label="B", size=8) +
  annotate(geom="text", x=-8, y=0.5, label="Adjusted for sex, height and lean
mass", size=6) +
  coord_cartesian(xlim = c(-8, 22), ylim = c(0, 0.4)) +

```



```

theme_bw() +
theme(legend.position = "none", panel.grid.major = element_blank(),
      panel.grid.minor = element_blank(), plot.title = element_text(size = 13.5),
      axis.title.x = element_text(size = 17)) +
xlab("Total energy expenditure (MJ/d)") +
ylab("") +
ggtitle("Adj. for height and fat free mass")
#annotation_custom(standing.pic, xmin = 15, xmax = 20, ymin = 0.1, ymax = 0.25)

f3 <- ggplot(DATA, aes(res.TEE3, fill = Sex)) + geom_density(alpha = 0.2) +
  #geom_vline(xintercept = mean(DATA$res.TEE3[which(DATA$Sex=="F")],
na.rm=TRUE),
  #
  linetype="dotted", color = "pink", size=1.25) +
  #geom_vline(xintercept = mean(DATA$res.TEE3[which(DATA$Sex=="M")],
na.rm=TRUE),
  #
  linetype="dotted", color = "cyan", size=1.2) +
  annotate(geom="text", x=-8, y=0.4, label="C", size=8) +
  #annotate(geom="text", x=-8, y=0.4, label="Adjusted for sex, height, lean mass,
fat mass and age", size=5) +
  coord_cartesian(xlim = c(-8, 22), ylim = c(0, 0.4)) +
  theme_bw() +
  theme(legend.position = "none", panel.grid.major = element_blank(),
        panel.grid.minor = element_blank(), plot.title = element_text(size = 13.5)) +
  xlab("") +
  ylab("") +
  ggtitle("Adj. height, fat free mass, fat mass, age")
#annotation_custom(standing.pic, xmin = 15, xmax = 20, ymin = 0.1, ymax = 0.25)

g1 <- ggplot(DATA_BEE_focus, aes(res.BEE1, fill = Sex)) + geom_density(alpha =
0.2) +

```

```

#geom_vline(xintercept =
mean(DATA_BEE_focus$res.BEE1[which(DATA_BEE_focus$Sex=="F")],
na.rm=TRUE),

#      linetype="dotted", color = "pink", size=1.25) +

#geom_vline(xintercept =
mean(DATA_BEE_focus$res.BEE1[which(DATA_BEE_focus$Sex=="M")],
na.rm=TRUE),

#      linetype="dotted", color = "cyan", size=1.2) +
annotate(geom="text", x=-4, y=0.7, label="D", size=8) +
coord_cartesian(xlim = c(-4, 7), ylim = c(0, 0.7)) +
theme_bw() +

theme(legend.position = "none", panel.grid.major = element_blank(),
panel.grid.minor = element_blank(),

axis.title.y = element_text(size = 17)) +
xlab("") +
ylab("Density")

#annotation_custom(basal.pic, xmin = 3.0, xmax = 6.5, ymin = 0.2, ymax = 0.6)

g2 <- ggplot(DATA_BEE_focus, aes(res.BEE2, fill = Sex)) + geom_density(alpha =
0.2) +

#geom_vline(xintercept =
mean(DATA_BEE_focus$res.BEE2[which(DATA_BEE_focus$Sex=="F")],
na.rm=TRUE),

#      linetype="dotted", color = "pink", size=1.25) +

#geom_vline(xintercept =
mean(DATA_BEE_focus$res.BEE2[which(DATA_BEE_focus$Sex=="M")],
na.rm=TRUE),

#      linetype="dotted", color = "cyan", size=1.2) +
annotate(geom="text", x=-4, y=0.7, label="E", size=8) +
coord_cartesian(xlim = c(-4, 7), ylim = c(0, 0.7)) +
theme_bw() +

theme(legend.position = "none", panel.grid.major = element_blank(),
panel.grid.minor = element_blank(),

axis.title.x = element_text(size = 17)) +

```

```

xlab("Basal energy expenditure (MJ/d)") +
ylab("")

#annotation_custom(basal.pic, xmin = 3.0, xmax = 6.5, ymin = 0.2, ymax = 0.6)

g3 <- ggplot(DATA_BEE_focus, aes(res.BEE3, fill = Sex)) + geom_density(alpha =
0.2) +
  #geom_vline(xintercept =
mean(DATA_BEE_focus$res.BEE3[which(DATA_BEE_focus$Sex=="F")],
na.rm=TRUE),
  #      linetype="dotted", color = "pink", size=1.25) +
  #geom_vline(xintercept =
mean(DATA_BEE_focus$res.BEE3[which(DATA_BEE_focus$Sex=="M")],
na.rm=TRUE),
  #      linetype="dotted", color = "cyan", size=1.2) +
  annotate(geom="text", x=-4, y=0.7, label="F", size=8) +
  coord_cartesian(xlim = c(-4, 7), ylim = c(0, 0.7)) +
  theme_bw() +
  theme(legend.position = "none", panel.grid.major = element_blank(),
        panel.grid.minor = element_blank(), axis.title.x = element_text(size = 9)) +
  xlab("") +
  ylab("")

#annotation_custom(basal.pic, xmin = 3.0, xmax = 6.5, ymin = 0.2, ymax = 0.6)

h1 <- ggplot(DATA_AEE_focus, aes(res.AEE1, fill = Sex)) + geom_density(alpha =
0.2) +
  #geom_vline(xintercept =
mean(DATA_AEE_focus$res.AEE1[which(DATA_AEE_focus$Sex=="F")],
na.rm=TRUE),
  #      linetype="dotted", color = "pink", size=1.25) +
  #geom_vline(xintercept =
mean(DATA_AEE_focus$res.AEE1[which(DATA_AEE_focus$Sex=="M")],
na.rm=TRUE),
  #      linetype="dotted", color = "cyan", size=1.2) +
  annotate(geom="text", x=-6, y=0.4, label="G", size=8) +

```

```

coord_cartesian(xlim = c(-6, 9), ylim = c(0, 0.4)) +
theme_bw() +
theme(legend.position = "none", panel.grid.major = element_blank(),
panel.grid.minor = element_blank()) +
xlab("") +
ylab("")
#annotation_custom(active1.pic, xmin = 3.5, xmax = 8, ymin = 0.1, ymax = 0.3)

h2 <- ggplot(DATA_AEE_focus, aes(res.AEE2, fill = Sex)) + geom_density(alpha =
0.2) +
#geom_vline(xintercept =
mean(DATA_AEE_focus$res.AEE2[which(DATA_AEE_focus$Sex=="F")],
na.rm=TRUE),
# linetype="dotted", color = "pink", size=1.25) +
#geom_vline(xintercept =
mean(DATA_AEE_focus$res.AEE2[which(DATA_AEE_focus$Sex=="M")],
na.rm=TRUE),
# linetype="dotted", color = "cyan", size=1.2) +
annotate(geom="text", x=-6, y=0.4, label="H", size=8) +
coord_cartesian(xlim = c(-6, 9), ylim = c(0, 0.4)) +
theme_bw() +
theme(legend.position = "none", panel.grid.major = element_blank(),
panel.grid.minor = element_blank(),
axis.title.x = element_text(size = 17)) +
xlab("Activity energy expenditure (MJ/d)") +
ylab("")
#annotation_custom(active1.pic, xmin = 3.5, xmax = 8, ymin = 0.1, ymax = 0.3)

h3 <- ggplot(DATA_AEE_focus, aes(res.AEE3, fill = Sex)) + geom_density(alpha =
0.2) +
#geom_vline(xintercept =
mean(DATA_AEE_focus$res.AEE3[which(DATA_AEE_focus$Sex=="F")],
na.rm=TRUE),
# linetype="dotted", color = "pink", size=1.25) +

```

```

#geom_vline(xintercept =
mean(DATA_AEE_focus$res.AEE3[which(DATA_AEE_focus$Sex=="M")],
na.rm=TRUE),

#   linetype="dotted", color = "cyan", size=1.2) +
annotate(geom="text", x=-6, y=0.4, label="I", size=8) +
coord_cartesian(xlim = c(-6, 9), ylim = c(0, 0.4)) +
theme_bw() +
theme(legend.position = "none", panel.grid.major = element_blank(),
      panel.grid.minor = element_blank(), axis.title.x = element_text(size = 9)) +
xlab("") +
ylab("")

#annotation_custom(active1.pic, xmin = 3.5, xmax = 8, ymin = 0.1, ymax = 0.3)

grid.arrange(f1, f2, f3, g1, g2, g3, h1, h2, h3, nrow=3)

dev.off()

```

## **SOM Table S1**

### **Unique participant identifiers for the IAEA DLW database v. 3.1.2.**

54

55

56

57

58

59

60

61

62

63

64

65

66

67

68

69

70

71

72

73

74

75

76

77

78

79

80

81

82

83

84  
85  
86  
87  
88  
89  
90  
91  
92  
93  
96  
97  
98  
99  
100  
103  
104  
105  
106  
107  
108  
109  
111  
112  
114  
115  
116  
117  
118  
119  
120  
121  
122  
123

124  
125  
126  
127  
128  
129  
130  
131  
132  
133  
134  
135  
136  
177  
178  
179  
180  
182  
201  
202  
203  
204  
205  
206  
207  
208  
209  
210  
211  
212  
213  
214  
215  
216



217  
218  
219  
220  
221  
222  
223  
224  
225  
226  
227  
228  
229  
234  
235  
236  
237  
238  
239  
240  
241  
242  
243  
244  
245  
246  
247  
248  
249  
250  
259  
260  
261  
262

263  
284  
285  
286  
287  
288  
289  
290  
291  
292  
293  
294  
295  
297  
298  
299  
300  
301  
302  
303  
304  
305  
306  
307  
308  
309  
312  
313  
314  
315  
316  
317  
318  
319

320  
321  
322  
323  
324  
325  
326  
327  
328  
329  
330  
331  
332  
333  
334  
335  
336  
337  
338  
339  
340  
341  
342  
343  
344  
345  
346  
347  
348  
349  
350  
351  
352  
353

354  
355  
356  
365  
366  
367  
368  
369  
370  
390  
391  
392  
393  
394  
395  
396  
397  
398  
399  
400  
401  
402  
403  
404  
405  
406  
407  
408  
409  
410  
411  
412  
413  
414

415  
416  
417  
418  
419  
420  
421  
422  
423  
424  
425  
426  
427  
428  
429  
430  
431  
432  
433  
434  
435  
436  
437  
438  
439  
440  
441  
442  
443  
444  
445  
446  
447  
448

449  
450  
451  
452  
453  
454  
455  
456  
457  
458  
459  
460  
461  
462  
463  
464  
465  
466  
467  
468  
469  
470  
471  
472  
473  
474  
475  
476  
477  
478  
479  
480  
481  
482

483  
484  
485  
486  
487  
488  
489  
490  
491  
492  
493  
494  
495  
496  
497  
498  
499  
500  
501  
502  
503  
504  
505  
506  
507  
508  
509  
510  
511  
512  
513  
514  
515  
516

517  
518  
519  
520  
521  
522  
523  
524  
525  
526  
527  
528  
529  
530  
531  
532  
533  
534  
535  
536  
537  
538  
539  
540  
541  
542  
543  
544  
545  
546  
547  
548  
549  
550



551  
552  
553  
554  
555  
556  
557  
558  
559  
560  
561  
562  
563  
564  
565  
566  
567  
568  
569  
570  
571  
572  
573  
574  
732  
733  
734  
735  
736  
737  
738  
739  
740  
741

742  
743  
744  
745  
746  
747  
748  
749  
750  
751  
752  
753  
754  
755  
756  
757  
758  
759  
760  
761  
762  
763  
764  
765  
766  
767  
768  
769  
770  
771  
772  
773  
774  
777

778  
779  
780  
782  
783  
784  
785  
786  
787  
788  
789  
790  
791  
792  
793  
794  
795  
796  
797  
798  
799  
800  
801  
802  
803  
804  
805  
806  
807  
808  
809  
810  
811  
812

813  
814  
815  
816  
817  
818  
819  
839  
845  
846  
847  
848  
849  
850  
851  
852  
853  
854  
855  
856  
857  
858  
859  
860  
861  
862  
863  
864  
865  
866  
867  
868  
869  
870

871  
872  
873  
874  
875  
876  
877  
878  
879  
880  
881  
882  
883  
884  
885  
886  
887  
888  
889  
890  
891  
892  
893  
894  
895  
896  
897  
898  
899  
927  
928  
929  
930  
931

932  
933  
934  
935  
936  
937  
938  
939  
940  
941  
942  
943  
944  
945  
946  
947  
948  
949  
950  
951  
952  
953  
954  
955  
956  
957  
958  
959  
960  
961  
962  
963  
964  
965

966  
967  
968  
969  
970  
971  
972  
973  
974  
975  
976  
977  
978  
979  
980  
981  
982  
983  
984  
985  
988  
991  
997  
998  
1001  
1002  
1003  
1005  
1006  
1007  
1008  
1009  
1011  
1012

1015  
1016  
1017  
1023  
1025  
1026  
1027  
1028  
1029  
1030  
1031  
1032  
1033  
1034  
1035  
1036  
1037  
1038  
1039  
1040  
1041  
1042  
1043  
1044  
1045  
1047  
1048  
1049  
1050  
1051  
1052  
1053  
1054  
1057



1059  
1060  
1064  
1067  
1068  
1072  
1074  
1078  
1079  
1080  
1081  
1082  
1084  
1098  
1099  
1100  
1101  
1102  
1103  
1104  
1105  
1106  
1107  
1108  
1109  
1110  
1111  
1112  
1113  
1114  
1115  
1116  
1117  
1118

1119  
1120  
1121  
1122  
1123  
1124  
1125  
1126  
1127  
1128  
1129  
1130  
1131  
1132  
1133  
1134  
1135  
1136  
1137  
1138  
1139  
1140  
1141  
1142  
1143  
1144  
1145  
1146  
1147  
1148  
1149  
1150  
1151  
1152

1153  
1154  
1155  
1156  
1157  
1158  
1159  
1160  
1161  
1162  
1163  
1164  
1165  
1166  
1167  
1168  
1169  
1170  
1171  
1172  
1173  
1174  
1175  
1176  
1177  
1178  
1179  
1180  
1181  
1182  
1183  
1184  
1185  
1186

1187  
1188  
1189  
1190  
1191  
1192  
1193  
1194  
1195  
1196  
1197  
1198  
1199  
1200  
1201  
1202  
1203  
1204  
1205  
1206  
1207  
1208  
1209  
1210  
1211  
1212  
1213  
1214  
1215  
1216  
1217  
1218  
1219  
1220

1221  
1222  
1223  
1224  
1225  
1226  
1227  
1228  
1229  
1230  
1231  
1232  
1233  
1234  
1235  
1236  
1237  
1238  
1239  
1240  
1241  
1242  
1243  
1244  
1245  
1246  
1247  
1248  
1249  
1250  
1251  
1252  
1253  
1254

1255  
1256  
1257  
1258  
1259  
1260  
1261  
1262  
1263  
1306  
1307  
1308  
1309  
1310  
1311  
1312  
1313  
1314  
1315  
1316  
1317  
1318  
1319  
1320  
1321  
1322  
1323  
1324  
1325  
1326  
1327  
1328  
1329  
1330

1331  
1332  
1333  
1334  
1335  
1336  
1337  
1338  
1339  
1340  
1341  
1342  
1343  
1344  
1345  
1346  
1347  
1348  
1349  
1350  
1351  
1352  
1353  
1354  
1355  
1356  
1357  
1358  
1359  
1360  
1544  
1545  
1546  
1547

1548  
1549  
1550  
1551  
1552  
1553  
1554  
1555  
1556  
1557  
1558  
1559  
1560  
1561  
1562  
1563  
1564  
1565  
1566  
1567  
1568  
1569  
1570  
1571  
1572  
1573  
1574  
1575  
1576  
1577  
1578  
1579  
1580  
1581



1582  
1583  
1584  
1585  
1586  
1587  
1588  
1589  
1590  
1591  
1592  
1593  
1594  
1595  
1596  
1597  
1598  
1599  
1600  
1601  
1602  
1603  
1604  
1605  
1606  
1607  
1608  
1609  
1610  
1611  
1612  
1613  
1614  
1615

1616  
1617  
1618  
1619  
1620  
1621  
1622  
1623  
1624  
1625  
1626  
1627  
1628  
1629  
1630  
1631  
1632  
1633  
1634  
1635  
1636  
1637  
1638  
1639  
1640  
1641  
1642  
1643  
1644  
1645  
1646  
1647  
1648  
1649

1650  
1651  
1652  
1653  
1654  
1655  
1656  
1657  
1658  
1659  
1660  
1667  
1668  
1669  
1670  
1671  
1678  
1679  
1682  
1683  
1686  
1687  
1688  
1689  
1690  
1691  
1692  
1693  
1694  
1695  
1698  
1705  
1706  
1709

1710  
1711  
1716  
1721  
1724  
1725  
1726  
1727  
1728  
1729  
1730  
1731  
1732  
1733  
1734  
1739  
1742  
1743  
1744  
1745  
1746  
1747  
1748  
1749  
1754  
1757  
1758  
1759  
1760  
1763  
1764  
1765  
1766  
1767

1768  
1769  
1770  
1771  
1772  
1773  
1774  
1775  
1779  
1780  
1781  
1782  
1783  
1784  
1785  
1788  
1789  
1790  
1793  
1794  
1801  
1802  
1807  
1808  
1809  
1810  
1815  
1816  
1817  
1818  
1819  
1820  
1821  
1822

1823  
1824  
1825  
1826  
1829  
1830  
1831  
1832  
1833  
1834  
1835  
1836  
1837  
1838  
1839  
1842  
1843  
1844  
1845  
1846  
1847  
1848  
1849  
1850  
1851  
1854  
1855  
1856  
1857  
1860  
1861  
1862  
1863  
1866

1867  
1868  
1869  
1870  
1871  
1872  
1873  
1874  
1875  
1878  
1887  
1888  
1889  
1894  
1895  
1898  
1899  
1900  
1901  
1902  
1903  
1904  
1905  
1906  
1907  
1908  
1909  
1912  
1915  
1916  
1917  
1918  
1919  
1920

1921  
1922  
1923  
1924  
1927  
1932  
1933  
1934  
1935  
1936  
1937  
1938  
1939  
1940  
1941  
1946  
1947  
1948  
1949  
1950  
1955  
1956  
1957  
1958  
1959  
1962  
1963  
1968  
1969  
1970  
1971  
1972  
1973  
1976



1977  
1982  
1983  
1984  
1993  
1994  
1995  
1996  
1997  
1998  
1999  
2004  
2009  
2010  
2011  
2012  
2013  
2014  
2019  
2020  
2029  
2030  
2033  
2036  
2037  
2038  
2039  
2040  
2041  
2042  
2043  
2044  
2045  
2046

2047  
2048  
2049  
2050  
2051  
2052  
2053  
2054  
2055  
2056  
2057  
2058  
2059  
2060  
2061  
2062  
2063  
2064  
2065  
2066  
2067  
2068  
2069  
2070  
2071  
2072  
2073  
2074  
2075  
2076  
2077  
2078  
2079  
2080

2081  
2082  
2083  
2084  
2085  
2086  
2087  
2088  
2089  
2090  
2091  
2092  
2093  
2094  
2095  
2096  
2097  
2098  
2100  
2101  
2102  
2103  
2104  
2105  
2106  
2107  
2108  
2109  
2110  
2111  
2112  
2113  
2114  
2115

2116  
2117  
2118  
2119  
2120  
2121  
2122  
2123  
2124  
2125  
2126  
2127  
2128  
2129  
2130  
2131  
2132  
2133  
2134  
2135  
2136  
2137  
2138  
2139  
2140  
2141  
2142  
2143  
2144  
2145  
2146  
2147  
2148  
2149

2150  
2151  
2152  
2153  
2154  
2155  
2156  
2157  
2158  
2159  
2160  
2161  
2162  
2163  
2164  
2165  
2166  
2167  
2168  
2169  
2170  
2171  
2172  
2173  
2174  
2175  
2176  
2177  
2178  
2179  
2180  
2181  
2182  
2183

2184  
2185  
2186  
2187  
2188  
2189  
2190  
2191  
2192  
2193  
2194  
2195  
2196  
2197  
2198  
2199  
2200  
2201  
2202  
2203  
2204  
2205  
2206  
2207  
2208  
2209  
2210  
2211  
2212  
2213  
2214  
2215  
2216  
2217

2218  
2219  
2220  
2221  
2222  
2223  
2224  
2225  
2226  
2227  
2228  
2229  
2230  
2231  
2232  
2233  
2234  
2235  
2236  
2237  
2238  
2239  
2240  
2241  
2242  
2243  
2244  
2245  
2246  
2247  
2248  
2249  
2250  
2251

2252  
2253  
2254  
2255  
2256  
2257  
2258  
2259  
2260  
2261  
2262  
2263  
2264  
2265  
2266  
2267  
2268  
2269  
2270  
2271  
2272  
2273  
2274  
2275  
2276  
2277  
2278  
2279  
2280  
2281  
2282  
2283  
2284  
2285



2286  
2287  
2288  
2289  
2290  
2291  
2292  
2293  
2294  
2295  
2296  
2297  
2298  
2299  
2300  
2301  
2302  
2303  
2304  
2305  
2306  
2307  
2308  
2309  
2310  
2311  
2312  
2313  
2314  
2315  
2316  
2317  
2318  
2319

2320  
2321  
2322  
2323  
2324  
2325  
2326  
2327  
2328  
2329  
2330  
2331  
2332  
2333  
2334  
2335  
2336  
2337  
2338  
2339  
2340  
2341  
2342  
2343  
2344  
2345  
2346  
2347  
2348  
2349  
2350  
2351  
2352  
2353

2354  
2355  
2356  
2357  
2358  
2359  
2360  
2361  
2362  
2363  
2364  
2365  
2366  
2367  
2368  
2369  
2370  
2371  
2372  
2373  
2374  
2375  
2376  
2377  
2378  
2379  
2380  
2381  
2382  
2383  
2384  
2385  
2386  
2387

2388  
2389  
2390  
2391  
2392  
2393  
2394  
2395  
2396  
2397  
2398  
2399  
2400  
2401  
2402  
2403  
2404  
2405  
2406  
2407  
2408  
2409  
2410  
2411  
2412  
2413  
2414  
2415  
2416  
2417  
2418  
2419  
2420  
2421

2422  
2423  
2424  
2425  
2426  
2427  
2428  
2429  
2430  
2431  
2432  
2433  
2434  
2435  
2436  
2437  
2438  
2439  
2440  
2441  
2442  
2443  
2444  
2445  
2446  
2447  
2448  
2449  
2450  
2451  
2452  
2453  
2454  
2455

2456  
2457  
2458  
2459  
2460  
2461  
2462  
2463  
2464  
2465  
2466  
2467  
2468  
2469  
2470  
2471  
2472  
2473  
2474  
2475  
2476  
2477  
2478  
2479  
2480  
2481  
2482  
2483  
2484  
2485  
2486  
2487  
2488  
2489

2490  
2491  
2492  
2493  
2494  
2495  
2496  
2497  
2498  
2499  
2500  
2501  
2502  
2503  
2504  
2505  
2506  
2507  
2508  
2509  
2510  
2511  
2512  
2513  
2514  
2515  
2516  
2517  
2518  
2519  
2520  
2521  
2522  
2523

2524  
2525  
2526  
2527  
2528  
2529  
2530  
2531  
2532  
2533  
2534  
2535  
2536  
2537  
2538  
2539  
2540  
2541  
2542  
2543  
2544  
2545  
2546  
2547  
2548  
2549  
2550  
2551  
2552  
2553  
2554  
2555  
2556  
2557



2558  
2559  
2560  
2561  
2562  
2563  
2564  
2565  
2566  
2567  
2568  
2569  
2570  
2571  
2572  
2657  
2733  
2734  
2735  
2736  
2737  
2740  
2741  
2742  
2743  
2744  
2745  
2746  
2747  
2748  
2749  
2750  
2751  
2752

2753  
2754  
2755  
2756  
2757  
2758  
2759  
2762  
2763  
2764  
2765  
2767  
2770  
2771  
2772  
2773  
2774  
2775  
2776  
2777  
2778  
2779  
2780  
2781  
2782  
2783  
2784  
2785  
2786  
2787  
2790  
2791  
2792  
2794

2795  
2797  
2798  
2799  
2800  
2801  
2804  
2805  
2806  
2807  
2810  
2811  
2812  
2813  
2814  
2815  
2818  
2819  
2820  
2823  
2826  
2829  
2830  
2831  
2832  
2833  
2834  
2835  
2836  
2837  
2838  
2839  
2840  
2841

2842  
2843  
2844  
2845  
2846  
2847  
2848  
2849  
2850  
2852  
2853  
2854  
2855  
2856  
2859  
2862  
2867  
2868  
2869  
2872  
2873  
2874  
2875  
2876  
2877  
2878  
2879  
2880  
2881  
2882  
2883  
2884  
2887  
2889

2892  
2893  
2894  
2895  
2896  
2897  
2902  
2905  
2906  
2907  
2908  
2909  
2910  
2911  
2912  
2913  
2918  
2921  
2924  
2929  
2930  
2931  
2936  
2937  
2942  
2943  
2946  
2947  
2948  
2949  
2950  
2953  
2954  
2955

2958  
2959  
2960  
2961  
2962  
2963  
2966  
2967  
2968  
2969  
2970  
2971  
2974  
2975  
2978  
2983  
2988  
2989  
2990  
2992  
2993  
3000  
3005  
3006  
3009  
3014  
3015  
3016  
3017  
3022  
3023  
3024  
3025  
3028

3029  
3030  
3031  
3032  
3033  
3034  
3035  
3036  
3037  
3038  
3039  
3040  
3041  
3042  
3043  
3044  
3045  
3046  
3047  
3048  
3049  
3050  
3051  
3052  
3053  
3054  
3055  
3056  
3057  
3058  
3059  
3060  
3061  
3062

3063  
3064  
3065  
3066  
3067  
3068  
3069  
3070  
3071  
3072  
3073  
3074  
3075  
3076  
3077  
3078  
3079  
3080  
3081  
3082  
3083  
3084  
3085  
3086  
3087  
3088  
3089  
3090  
3091  
3092  
3093  
3094  
3095  
3096



3097  
3098  
3099  
3100  
3101  
3102  
3103  
3104  
3105  
3106  
3107  
3108  
3109  
3110  
3111  
3112  
3113  
3114  
3115  
3116  
3117  
3118  
3119  
3120  
3121  
3122  
3123  
3124  
3125  
3127  
3128  
3129  
3130  
3131

3132  
3133  
3134  
3135  
3136  
3137  
3138  
3139  
3140  
3141  
3142  
3143  
3144  
3145  
3146  
3147  
3148  
3149  
3150  
3151  
3152  
3153  
3154  
3155  
3156  
3157  
3158  
3159  
3160  
3161  
3162  
3163  
3164  
3165

3166  
3167  
3168  
3169  
3170  
3171  
3172  
3173  
3174  
3175  
3176  
3177  
3178  
3179  
3180  
3181  
3182  
3183  
3184  
3185  
3186  
3187  
3188  
3189  
3190  
3191  
3192  
3193  
3194  
3195  
3196  
3197  
3198  
3199

3200  
3201  
3202  
3203  
3204  
3205  
3206  
3207  
3208  
3209  
3210  
3211  
3212  
3213  
3214  
3215  
3216  
3217  
3218  
3219  
3220  
3221  
3222  
3223  
3224  
3225  
3226  
3227  
3228  
3229  
3230  
3231  
3232  
3233

3234  
3235  
3236  
3237  
3238  
3239  
3240  
3241  
3242  
3243  
3244  
3245  
3246  
3247  
3248  
3249  
3250  
3251  
3252  
3253  
3254  
3255  
3256  
3257  
3258  
3259  
3260  
3261  
3262  
3263  
3264  
3265  
3266  
3267

3268  
3269  
3270  
3271  
3272  
3273  
3274  
3275  
3276  
3277  
3278  
3279  
3280  
3281  
3282  
3283  
3284  
3285  
3286  
3287  
3288  
3289  
3290  
3291  
3292  
3293  
3294  
3295  
3296  
3297  
3298  
3299  
3300  
3301

3302  
3303  
3304  
3305  
3306  
3307  
3308  
3309  
3310  
3311  
3312  
3313  
3314  
3315  
3316  
3317  
3318  
3319  
3320  
3321  
3322  
3323  
3324  
3325  
3326  
3327  
3328  
3329  
3330  
3331  
3332  
3333  
3334  
3335

3336  
3337  
3338  
3339  
3340  
3341  
3342  
3343  
3344  
3345  
3346  
3347  
3348  
3349  
3350  
3351  
3352  
3353  
3354  
3355  
3356  
3357  
3358  
3359  
3360  
3361  
3362  
3363  
3364  
3365  
3366  
3367  
3368  
3369



3370  
3371  
3372  
3373  
3374  
3375  
3376  
3377  
3378  
3379  
3380  
3381  
3382  
3383  
3384  
3385  
3386  
3387  
3388  
3389  
3390  
3391  
3392  
3393  
3394  
3395  
3396  
3397  
3398  
3399  
3400  
3401  
3402  
3403

3404  
3405  
3406  
3407  
3408  
3409  
3410  
3411  
3412  
3413  
3414  
3415  
3416  
3417  
3418  
3419  
3420  
3421  
3422  
3423  
3424  
3425  
3426  
3427  
3428  
3429  
3430  
3431  
3432  
3433  
3434  
3435  
3436  
3437

3438  
3439  
3440  
3441  
3442  
3443  
3444  
3445  
3446  
3447  
3448  
3449  
3450  
3451  
3452  
3453  
3454  
3455  
3456  
3457  
3458  
3459  
3460  
3461  
3462  
3463  
3464  
3465  
3466  
3467  
3468  
3469  
3470  
3471

3472  
3473  
3474  
3475  
3476  
3477  
3478  
3479  
3480  
3481  
3482  
3483  
3484  
3485  
3486  
3487  
3488  
3489  
3490  
3491  
3492  
3493  
3494  
3495  
3496  
3497  
3498  
3499  
3500  
3501  
3502  
3503  
3504  
3505

3506  
3507  
3508  
3509  
3510  
3511  
3512  
3513  
3514  
3515  
3516  
3517  
3518  
3519  
3520  
3521  
3522  
3523  
3524  
3525  
3526  
3527  
3528  
3529  
3530  
3531  
3532  
3533  
3534  
3535  
3536  
3537  
3538  
3539

3540  
3541  
3542  
3543  
3544  
3545  
3546  
3547  
3548  
3549  
3550  
3551  
3552  
3553  
3554  
3555  
3556  
3557  
3558  
3559  
3560  
3561  
3562  
3563  
3564  
3565  
3566  
3567  
3568  
3569  
3570  
3571  
3572  
3573

3574  
3575  
3576  
3577  
3578  
3579  
3580  
3581  
3582  
3583  
3584  
3585  
3586  
3587  
3588  
3589  
3590  
3591  
3592  
3593  
3594  
3595  
3596  
3597  
3598  
3599  
3600  
3601  
3602  
3603  
3604  
3605  
3606  
3607

3608  
3609  
3610  
3611  
3612  
3613  
3614  
3615  
3616  
3617  
3618  
3619  
3620  
3621  
3622  
3623  
3624  
3625  
3626  
3627  
3628  
3629  
3630  
3631  
3632  
3633  
3634  
3635  
3636  
3637  
3638  
3639  
3640  
3641



3642  
3643  
3644  
3645  
3646  
3647  
3648  
3649  
3650  
3651  
3652  
3653  
3654  
3655  
3656  
3657  
3658  
3659  
3660  
3661  
3662  
3663  
3664  
3665  
3666  
3667  
3668  
3669  
3670  
3671  
3672  
3673  
3674  
3675

3676  
3677  
3678  
3679  
3680  
3681  
3682  
3683  
3684  
3685  
3686  
3687  
3688  
3689  
3690  
3691  
3692  
3693  
3694  
3695  
3696  
3697  
3698  
3699  
3700  
3701  
3702  
3703  
3704  
3705  
3706  
3707  
3708  
3709

3710  
3711  
3712  
3713  
3714  
3715  
3716  
3717  
3718  
3719  
3720  
3721  
3722  
3723  
3724  
3725  
3726  
3727  
3728  
3729  
3730  
3731  
3732  
3733  
3734  
3735  
3736  
3737  
3738  
3739  
3740  
3741  
3742  
3743

3744  
3745  
3746  
3747  
3748  
3749  
3750  
3751  
3752  
3753  
3754  
3755  
3756  
3757  
3758  
3759  
3760  
3761  
3762  
3763  
3764  
3765  
3766  
3767  
3768  
3769  
3770  
3771  
3772  
3773  
3774  
3775  
3776  
3777

3778  
3779  
3780  
3781  
3782  
3783  
3784  
3785  
3786  
3787  
3788  
3789  
3790  
3791  
3793  
3794  
3795  
3796  
3797  
3798  
3799  
3800  
3801  
3802  
3803  
3804  
3805  
3806  
3807  
3808  
3809  
3810  
3811  
3812

3813  
3814  
3815  
3816  
3817  
3818  
3819  
3820  
3821  
3822  
3823  
3824  
3825  
3826  
3827  
3828  
3829  
3830  
3831  
3832  
3833  
3834  
3835  
3836  
3837  
3838  
3839  
3840  
3841  
3842  
3843  
3844  
3845  
3846

3847  
3848  
3849  
3850  
3851  
3852  
3853  
3854  
3855  
3856  
3857  
3858  
3859  
3860  
3861  
3862  
3863  
3864  
3865  
3866  
3867  
3868  
3869  
3870  
3871  
3872  
3873  
3874  
3875  
3876  
3877  
3878  
3879  
3880

3881  
3882  
3883  
3884  
3885  
3886  
3887  
3888  
3889  
3890  
3891  
3892  
3893  
3894  
3895  
3896  
3897  
3898  
3899  
3900  
3901  
3902  
3903  
3904  
3905  
3906  
3907  
3908  
3909  
3910  
3911  
3912  
3913  
3914



3915  
3916  
3917  
3918  
3919  
3920  
3921  
3922  
3923  
3924  
3925  
3926  
3927  
3928  
3929  
3930  
3931  
3932  
3933  
3934  
3935  
3936  
3937  
3938  
3939  
3940  
3941  
3942  
3943  
3944  
3945  
3946  
3947  
3948

3949  
3950  
3951  
3952  
3953  
3954  
3955  
3956  
3957  
3958  
3959  
3960  
3961  
3962  
3963  
3964  
3965  
3966  
3967  
3968  
3969  
3970  
3971  
3972  
3973  
3974  
3975  
3976  
3977  
3978  
3979  
3980  
3981  
3982

3983  
3984  
3985  
3986  
3987  
3988  
3989  
3990  
3991  
3992  
3993  
3994  
3995  
3996  
3997  
3998  
3999  
4000  
4001  
4002  
4003  
4004  
4005  
4006  
4007  
4008  
4009  
4010  
4011  
4012  
4013  
4014  
4015  
4016

4017  
4018  
4019  
4020  
4021  
4022  
4023  
4024  
4025  
4026  
4027  
4028  
4029  
4030  
4031  
4032  
4033  
4034  
4035  
4036  
4037  
4038  
4039  
4040  
4041  
4042  
4043  
4044  
4045  
4046  
4047  
4048  
4049  
4050

4051  
4052  
4053  
4054  
4055  
4056  
4057  
4058  
4059  
4060  
4061  
4062  
4063  
4064  
4065  
4066  
4067  
4068  
4069  
4070  
4071  
4072  
4073  
4074  
4075  
4076  
4077  
4078  
4079  
4080  
4081  
4082  
4083  
4084

4085  
4086  
4087  
4088  
4089  
4090  
4091  
4092  
4093  
4094  
4095  
4096  
4097  
4098  
4099  
4100  
4101  
4102  
4103  
4104  
4105  
4106  
4107  
4108  
4109  
4110  
4111  
4112  
4113  
4114  
4115  
4116  
4117  
4118

4119  
4120  
4121  
4122  
4123  
4124  
4125  
4126  
4127  
4128  
4129  
4130  
4131  
4132  
4133  
4134  
4135  
4136  
4137  
4138  
4139  
4140  
4141  
4142  
4143  
4144  
4145  
4146  
4147  
4148  
4149  
4150  
4151  
4152

4153  
4154  
4155  
4156  
4157  
4158  
4159  
4160  
4161  
4162  
4163  
4164  
4165  
4166  
4167  
4168  
4169  
4170  
4171  
4172  
4173  
4174  
4175  
4176  
4177  
4178  
4179  
4180  
4181  
4182  
4183  
4184  
4185  
4186



4187  
4188  
4189  
4190  
4191  
4192  
4193  
4194  
4195  
4196  
4197  
4198  
4199  
4200  
4201  
4202  
4203  
4204  
4205  
4206  
4207  
4208  
4209  
4210  
4211  
4212  
4213  
4214  
4215  
4216  
4217  
4218  
4219  
4220

4221  
4222  
4223  
4224  
4225  
4231  
4237  
4238  
4239  
4240  
4241  
4242  
4243  
4244  
4247  
4248  
4249  
4250  
4252  
4253  
4254  
4255  
4256  
4257  
4258  
4259  
4260  
4261  
4262  
4267  
4271  
4272  
4276  
4277

4281  
4282  
4283  
4284  
4285  
4286  
4287  
4288  
4310  
4311  
4312  
4313  
4314  
4315  
4341  
4342  
4343  
4344  
4345  
4346  
4347  
4348  
4349  
4350  
4351  
4352  
4353  
4354  
4355  
4356  
4357  
4358  
4359  
4360

4361  
4362  
4363  
4364  
4365  
4366  
4367  
4368  
4369  
4370  
4820  
4989  
4990  
4991  
4992  
4993  
4994  
4995  
4996  
4997  
4998  
4999  
5000  
5001  
5002  
5003  
5004  
5005  
5006  
5007  
5036  
5037  
5038  
5039

5040  
5041  
5042  
5043  
5044  
5045  
5046  
5047  
5048  
5049  
5050  
5051  
5052  
5053  
5054  
5055  
5056  
5057  
5058  
5059  
5060  
5061  
5062  
5063  
5064  
5065  
5066  
5067  
5068  
5069  
5070  
5071  
5072  
5073

5074  
5075  
5076  
5077  
5078  
5079  
5083  
5084  
5085  
5086  
5087  
5091  
5092  
5093  
5094  
5100  
5105  
5106  
5107  
5108  
5109  
5110  
5111  
5112  
5115  
5116  
5117  
5118  
5120  
5121  
5122  
5123  
5127  
5128

5129  
5130  
5131  
5132  
5133  
5138  
5149  
5150  
5151  
5156  
5159  
5160  
5161  
5162  
5163  
5164  
5174  
5175  
5176  
5177  
5178  
5282  
5299  
5301  
5313  
5335  
5343  
5344  
5345  
5346  
5347  
6219  
6220  
6221

6222  
6223  
6224  
6225  
6226  
6227  
6228  
6229  
6230  
6231  
6232  
6233  
6234  
6235  
6236  
6237  
6238  
6239  
6240  
6241  
6242  
6243  
6244  
6245  
6246  
6247  
6248  
6249  
6250  
6251  
6252  
6253  
6254  
6255



6256  
6257  
6258  
6259  
6260  
6261  
6262  
6263  
6264  
6265  
6266  
6267  
6268  
6269  
6270  
6271  
6272  
6273  
6274  
6275  
6276  
6277  
6278  
6279  
6280  
6281  
6282  
6283  
6284  
6285  
6286  
6287  
6288  
6289

6290  
6291  
6292  
6293  
6294  
6295  
6296  
6297  
6298  
6299  
6300  
6301  
6302  
6303  
6304  
6305  
6306  
6307  
6308  
6309  
6310  
6311  
6312  
6313  
6314  
6315  
6316  
6317  
6318  
6319  
6320  
6321  
6322  
6323

6324  
6325  
6326  
6327  
6328  
6329  
6330  
6331  
6332  
6333  
6334  
6335  
6336  
6337  
6338  
6339  
6340  
6341  
6342  
6343  
6344  
6345  
6346  
6347  
6348  
6349  
6350  
6351  
6352  
6353  
6354  
6355  
6356  
6357

6358  
6359  
6360  
6361  
6362  
6363  
6364  
6365  
6366  
6367  
6368  
6369  
6370  
6371  
6372  
6373  
6374  
6375  
6376  
6377  
6378  
6379  
6380  
6381  
6382  
6383  
6384  
6385  
6386  
6387  
6388  
6389  
6390  
6391

6392  
6393  
6394  
6395  
6396  
6397  
6398  
6399  
6400  
6401  
6402  
6403  
6404  
6405  
6406  
6407  
6408  
6409  
6410  
6411  
6412  
6413  
6414  
6415  
6416  
6417  
6418  
6419  
6420  
6421  
6422  
6423  
6424  
6425

6426  
6427  
6428  
6429  
6430  
6431  
6432  
6433  
6434  
6435  
6436  
6437  
6438  
6439  
6440  
6441  
6442  
6443  
6444  
6445  
6446  
6447  
6448  
6449  
6450  
6451  
6452  
6453  
6454  
6455  
6456  
6457  
6458  
6459

6460  
6461  
6462  
6463  
6464  
6465  
6717  
6718  
6719  
6720  
6721  
6722  
6723  
6724  
6725  
6726  
6727  
6728  
6729  
6730  
6731  
6732  
6733  
6734  
6735  
6736  
6737  
6738  
6739  
6740  
6741  
6742  
6743  
6744

6745  
6746  
6747  
6748  
6749  
6750  
6751  
6752  
6753  
6754  
6755  
6756  
6757  
6758  
6759  
6760  
6761  
6762  
6763  
6764  
6765  
6766  
6767  
6768  
6769  
6770  
6771  
6772  
6773  
6774  
6775  
6776  
6777  
6778



6779  
6780  
6781  
6782  
6783  
6784  
6785  
6786  
6787  
6788  
6789  
6790  
6791  
6792  
6793  
6794  
6795  
6796  
6797  
6798  
6799  
6800  
6801  
6802  
6803  
6804  
6805  
6806  
6807  
6808  
6809  
6810  
6811  
6812

6813  
6814  
6815  
6816  
6817  
6818  
6819  
6820  
6821  
6822  
6823  
6824  
6825  
6826  
6827  
6828  
6829  
6830  
6831  
6832  
6833  
6834  
6835  
6836  
6837  
6838  
6839  
6840  
6841  
6842  
6843  
6844  
6845  
6846

6847  
6848  
6849  
6850  
6851  
6852  
6853  
6854  
6855  
6856  
6857  
6858  
6859  
6860  
6861  
6862  
6863  
6864  
6865  
6866  
6867  
6868  
6869  
6870  
6871  
6872  
6873  
6874  
6875  
6876  
6877  
6878  
6879  
6880

6881  
6882  
6883  
6884  
6885  
6886  
6887  
6888  
6889  
6890  
6891  
6892  
6893  
6894  
6895  
6896  
6897  
6898  
6899  
6900  
6901  
6902  
6903  
6904  
6905  
6906  
6907  
6908  
6909  
6910  
6911  
6912  
6913  
6914

6915  
6916  
6917  
6918  
6919  
6920  
6921  
6922  
6923  
6924  
6925  
6926  
6927  
6928  
6929  
6930  
6931  
6932  
6933  
6934  
6935  
6936  
6937  
6938  
6939  
6940  
6941  
6942  
6943  
6944  
6945  
6946  
6947  
6948

6949  
6950  
6951  
6952  
6953  
6954  
6955  
6956  
6957  
6958  
6959  
6960  
6961  
6962  
6963  
6964  
6965  
6966  
6967  
6968  
6969  
6970  
6971  
6972  
6973  
6974  
6975  
6976  
6977  
6978  
6979  
6980  
6981  
6982

6983  
6984  
6985  
6986  
6987  
6988  
6989  
6990  
6991  
6992  
6993  
6994  
6995  
6996  
6997  
6998  
6999  
7000  
7001  
7002  
7003  
7004  
7005  
7006  
7007  
7008  
7009  
7010  
7011  
7012  
7013  
7014  
7015  
7016

7017  
7018  
7019  
7020  
7021  
7022  
7023  
7024  
7025  
7026  
7027  
7028  
7029  
7030  
7031  
7032  
7033  
7034  
7035  
7036  
7037  
7038  
7039  
7040  
7112  
7113  
7114  
7115  
7116  
7117  
7118  
7119  
7120  
7121



7122  
7123  
7124  
7125  
7126  
7127  
7128  
7129  
7130  
7131  
7132  
7133  
7134  
7135  
7136  
7137  
7138  
7139  
7140  
7141  
7142  
7143  
7144  
7145  
7146  
7147  
7148  
7149  
7150  
7151  
7152  
7153  
7154  
7155

7156  
7157  
7158  
7159  
7160  
7161  
7162  
7163  
7164  
7165  
7166  
7167  
7168  
7169  
7170  
7171  
7172  
7173  
7174  
7175  
7176  
7177  
7178  
7179  
7180  
7181  
7182  
7183  
7184  
7185  
7186  
7187  
7189  
7190

7191  
7192  
7193  
7194  
7195  
7196  
7197  
7198  
7199  
7200  
7201  
7202  
7203  
7204  
7205  
7206  
7207  
7208  
7209  
7210  
7211  
7212  
7213  
7215  
7217  
7218  
7219  
7220  
7221  
7223  
7224  
7225  
7226  
7227

7228  
7229  
7230  
7231  
7232  
7233  
7234  
7235  
7236  
7237  
7238  
7239  
7240  
7241  
7242  
7243  
7244  
7245  
7246  
7247  
7248  
7249  
7250  
7251  
7252  
7253  
7255  
7256  
7257  
7258  
7259  
7260  
7261  
7262

7263  
7264  
7265  
7266  
7267  
7268  
7269  
7270  
7271  
7272  
7273  
7275  
7276  
7277  
7278  
7279  
7280  
7281  
7282  
7283  
7285  
7286  
7287  
7288  
7289  
7290  
7291  
7292  
7293  
7294  
7295  
7296  
7297  
7298

7299  
7300  
7301  
7302  
7303  
7304  
7305  
7306  
7307  
7308  
7309  
7310  
7311  
7312  
7313  
7314  
7315  
7316  
7317  
7318  
7319  
7320  
7321  
7322  
7323  
7324  
7325  
7327  
7328  
7329  
7330  
7331  
7333  
7334

7335  
7336  
7337  
7338  
7339  
7340  
7341  
7342  
7343  
7344  
7345  
7346  
7347  
7348  
7349  
7350  
7351  
7352  
7354  
7355  
7356  
7357  
7358  
7359  
7360  
7361  
7362  
7363  
7364  
7365  
7366  
7367  
7368  
7369

7370  
7371  
7372  
7373  
7374  
7375  
7376  
7377  
7378  
7379  
7380  
7381  
7382  
7383  
7384  
7385  
7386  
7387  
7388  
7389  
7391  
7392  
7393  
7394  
7395  
7396  
7397  
7398  
7399  
7400  
7401  
7402  
7404  
7405



7406  
7407  
7410  
7411  
7412  
7413  
7415  
7416  
7417  
7418  
7419  
7420  
7421  
7422  
7423  
7424  
7425  
7426  
7427  
7428  
7430  
7431  
7432  
7433  
7434  
7435  
7436  
7437  
7438  
7439  
7440  
7441  
7442  
7443

7444  
7445  
7446  
7447  
7448  
7449  
7450  
7451  
7452  
7453  
7454  
7455  
7456  
7457  
7458  
7459  
7460  
7461  
7462  
7463  
7464  
7465  
7466  
7468  
7469  
7470  
7471  
7472  
7473  
7474  
7475  
7476  
7477  
7478

7479  
7480  
7481  
7482  
94  
101  
1661  
1663  
1665  
1672  
1674  
1676  
1680  
1684  
1696  
1699  
1701  
1703  
1707  
1712  
1714  
1717  
1719  
1722  
1735  
1737  
1740  
1750  
1752  
1755  
1761  
1777  
1786  
1791

1795  
1797  
1799  
1803  
1805  
1811  
1813  
1827  
1840  
1852  
1858  
1864  
1876  
1879  
1881  
1883  
1885  
1890  
1892  
1896  
1910  
1913  
1925  
1928  
1930  
1942  
1944  
1951  
1953  
1960  
1964  
1966  
1974  
1978

1980  
1985  
1987  
1989  
1991  
2000  
2002  
2005  
2007  
2015  
2017  
2021  
2023  
2025  
2027  
2031  
2034  
2738  
2760  
2768  
2788  
2802  
2808  
2816  
2821  
2824  
2827  
2857  
2860  
2863  
2865  
2870  
2885  
2890

2898  
2900  
2903  
2914  
2916  
2919  
2922  
2925  
2927  
2932  
2934  
2938  
2940  
2944  
2951  
2956  
2964  
2972  
2976  
2979  
2981  
2984  
2986  
2994  
2996  
2998  
3001  
3003  
3007  
3010  
3012  
3018  
3020  
3026

4552  
4554  
4556  
4558  
4560  
4562  
4564  
4566  
4568  
4570  
4572  
4574  
4576  
4578  
4580  
4582  
4584  
4586  
4588  
4590  
4592  
4594  
4596  
4598  
4600  
4602  
4604  
4606  
4608  
4610  
4612  
4614  
4616  
4618

4620  
4622  
4624  
4626  
4628  
4630  
4632  
4634  
4636  
4638  
4640  
4642  
4644  
4646  
4648  
4650  
4652  
4654  
4656  
4658  
4660  
4662  
4664  
4666  
4668  
4670  
4672  
4674  
4676  
4678  
4680  
4682  
4684  
4686



4688  
4690  
4692  
4694  
4696  
4698  
4700  
4702  
4704  
4706  
4708  
4710  
4712  
4714  
4716  
4718  
4720  
4722  
4724  
4726  
4728  
4730  
4732  
4734  
4736  
4738  
4740  
4742  
4744  
4746  
4748  
4750  
4752  
4754

4756  
4758  
4760  
4762  
4764  
4766  
4768  
4770  
4772  
4774  
4776  
4778  
4780  
4782  
4784  
4786  
4788  
4790  
4792  
4794  
4796  
4798  
4800  
4802  
4804  
4806  
4808  
4810  
4812  
4814  
4816  
4818  
4821  
4823

4825  
4827  
4829  
4831  
4833  
4835  
4837  
4839  
4841  
4843  
4845  
4847  
4849  
4851  
4853  
4855  
4857  
4859  
4861  
4863  
4865  
4867  
4869  
4871  
4873  
4875  
4877  
4879  
4881  
4883  
4885  
4887  
4889  
4891

4893  
4895  
4897  
4899  
4901  
4903  
4905  
4907  
4909  
4911  
4913  
4915  
4917  
4919  
4921  
4923  
4925  
4927  
4929  
4931  
4933  
4935  
4937  
4939  
4941  
4943  
4945  
4947  
4949  
4951  
4953  
4955  
4957  
4959

4961  
4963  
4965  
4967  
4969  
4971  
4973  
4975  
4977  
4979  
4981  
4983  
4985  
4987

## **SOM Table S2**

Disaggregation of the data into 'Western' and 'non-Western' countries. Western countries: United States, Germany, The Netherlands, Australia, Finland, Belgium, Sweden, France, UK, Norway, Greece. Non-western countries: Bolivia, Chile, China, Ecuador, Ghana, Jamaica, Japan, Kenya, Mauritius, Nigeria, Nepal, Seychelles, Tanzania, South Africa.

**SOM Table S3**

The ethnic makeup of Western and non-Western countries based on available data.

| <b>Ethnicity</b> | <b>Western/non-Western countries</b> | <b>%</b> |
|------------------|--------------------------------------|----------|
| African          | non-West                             | 61.0     |
| African American | West                                 | 18.0     |
| Asian            | non-West                             | 26.0     |
| Asian            | West                                 | 1.7      |
| Caucasian        | non-West                             | 1.3      |
| Caucasian        | West                                 | 77.0     |
| Hunter-gatherer  | non-West                             | 0.9      |
| Hunter-gatherer  | West                                 | 2.7      |
| Other            | non-West                             | 10.7     |
| Other            | West                                 | 0.7      |

## **SOM References**

R Core Team, 2021. R: A language and environment for statistical computing. R

Foundation for Statistical Computing, Vienna, Austria. URL <http://www.R-project.org/>
